# Supplementary material for: Full prediction of unsaturated hydraulic conductivity – comparison of four different capillary bundle models
Source: Copernicus journal article supplement (doi:10.5194/hess-2023-134), 2023-06-16
Supplement: Supplementary file 1 [file DataSets.xlsx]

## Sheet: Cal1_Cal6
cannot be shared due to copy right restrictions

## Sheet: Cal7
h	theta		h	K
[cm]	[-]		[cm]	[cm/d]
-0.69	0.4163		-63.1	0.37154
-2.17	0.4162		-66.07	0.38019
-3.3	0.416		-72.11	0.32359
-4.45	0.4157		-75.34	0.26303
-5.66	0.4154		-79.07	0.18621
-6.98	0.415		-82.79	0.13183
-8.43	0.4145		-86.3	0.10471
-10.33	0.4139		-90.57	0.089125
-12.74	0.4133		-95.06	0.075858
-15.56	0.4125		-99.54	0.066069
-18.75	0.4116		-104.47	0.054954
-22.13	0.4106		-109.65	0.048978
-26	0.4095		-114.82	0.044668
-30.27	0.4083		-120.5	0.039811
-34.91	0.4069		-126.47	0.035481
-40.09	0.4054		-133.05	0.030903
-44.57	0.4037		-139.32	0.027542
-48.98	0.4019		-145.88	0.025704
-49.77	0.4		-153.46	0.022909
-46.24	0.398		-162.18	0.020417
-39.99	0.3958		-171.4	0.018197
-38.99	0.3934		-181.13	0.016596
-39.26	0.391		-190.99	0.015136
-40.93	0.3885		-200.91	0.014125
-48.19	0.3858		-211.35	0.013183
-52.6	0.3831		-222.33	0.012303
-56.49	0.3803		-233.88	0.011482
-59.98	0.3775		-245.47	0.010715
-63.1	0.3747		-257.63	0.01
-66.07	0.3718		-270.4	0.0093325
-69.18	0.3691		-283.14	0.0087096
-72.11	0.3663		-296.48	0.0083176
-75.34	0.3637		-310.46	0.0077625
-79.07	0.3613		-325.09	0.0072444
-82.79	0.359		-340.41	0.0067608
-86.3	0.357		-358.1	0.0063096
-90.57	0.355		-376.7	0.0058884
-95.06	0.3532		-396.28	0.0054954
-99.54	0.3513		-416.87	0.0052481
-104.47	0.3496		-440.55	0.0047863
-109.65	0.3477		-466.66	0.0043652
-114.82	0.3459		-495.45	0.0038905
-120.5	0.3441		-526.02	0.0036308
-126.47	0.3422		-559.76	0.0032359
-133.05	0.3404		-597.04	0.002884
-139.32	0.3385		-636.8	0.0026303
-145.88	0.3366		-679.2	0.0023988
-153.46	0.3347		-724.44	0.0021878
-162.18	0.3327		-772.68	0.0019953
-171.4	0.3306		-824.14	0.0017783
-181.13	0.3286		-872.97	0.0016596
-190.99	0.3265		-918.33	0.0015136
-200.91	0.3244		-963.83	0.0013804
-211.35	0.3222		-1011.58	0.0012303
-222.33	0.32		-1064.14	0.0010965
-233.88	0.3178		-1116.86	0.00097724
-245.47	0.3155		-1174.9	0.00087096
-257.63	0.3132		-1235.95	0.00077625
-270.4	0.3108		-5584.7	3.5481e-05
-283.14	0.3085		-1	3.7154
-296.48	0.306		-2	3.7154
-310.46	0.3036		-3.98	3.7154
-325.09	0.3011		-6.03	3.1623
-340.41	0.2986		-7.94	2.884
-358.1	0.296		-10	2.6915
-376.7	0.2934
-396.28	0.2906
-416.87	0.2878
-440.55	0.2849
-466.66	0.2819
-495.45	0.2788
-526.02	0.2757
-559.76	0.2725
-597.04	0.2692
-636.8	0.2659
-679.2	0.2626
-724.44	0.2593
-772.68	0.256
-824.14	0.2527
-872.97	0.2495
-918.33	0.2463
-963.83	0.2432
-1011.58	0.2401
-1064.14	0.2371
-1116.86	0.2341
-1174.9	0.2311
-1235.95	0.2281
-5584.7	0.1442

## Sheet: Cal8
h	theta		h	K
[cm]	[-]		[cm]	[cm/d]
-0.01	0.4493		-65.46	0.38019
-0.15	0.4489		-66.37	0.26303
-1.6	0.4484		-68.39	0.24547
-2.62	0.4479		-72.44	0.2884
-3.62	0.4474		-76.03	0.29512
-4.62	0.4468		-79.25	0.26303
-5.66	0.4462		-81.28	0.24547
-6.78	0.4456		-82.6	0.17783
-8.04	0.4449		-86.3	0.16218
-9.51	0.4442		-90.78	0.16982
-11.07	0.4435		-93.97	0.15488
-12.88	0.4427		-97.5	0.15136
-14.89	0.4419		-101.62	0.13183
-17.06	0.4411		-105.93	0.11749
-19.32	0.4402		-110.92	0.1
-21.83	0.4393		-116.95	0.083176
-24.72	0.4384		-122.74	0.077625
-28.05	0.4374		-128.23	0.074131
-31.62	0.4364		-134.28	0.067608
-35.4	0.4354		-140.28	0.058884
-39.54	0.4343		-146.55	0.051286
-43.85	0.4332		-153.82	0.047863
-48.42	0.4321		-161.06	0.045709
-53.33	0.4309		-168.27	0.041687
-56.49	0.4297		-176.2	0.037154
-58.34	0.4285		-184.5	0.033113
-60.26	0.4273		-193.2	0.030903
-60.95	0.426		-202.3	0.02884
-62.95	0.4247		-212.32	0.026303
-65.46	0.4233		-221.82	0.024547
-66.37	0.4219		-232.27	0.022387
-68.39	0.4205		-241.55	0.019498
-72.44	0.4191		-251.19	0.017783
-76.03	0.4177		-262.42	0.017783
-79.25	0.4162		-274.16	0.016596
-81.28	0.4147		-285.76	0.015488
-82.6	0.4132		-297.17	0.014454
-86.3	0.4116		-309.03	0.01349
-90.78	0.4101		-321.37	0.012589
-93.97	0.4085		-334.2	0.011482
-97.5	0.4069		-346.74	0.010965
-101.62	0.4053		-358.1	0.010471
-105.93	0.4036		-369.83	0.01
-110.92	0.402		-382.82	0.0093325
-116.95	0.4003		-398.11	0.0085114
-122.74	0.3986		-415.91	0.0074131
-128.23	0.3969		-435.51	0.0064565
-134.28	0.3952		-457.09	0.0054954
-140.28	0.3935		-479.73	0.0047863
-146.55	0.3917		-503.5	0.0040738
-153.82	0.39		-529.66	0.0034674
-161.06	0.3882		-557.19	0.0031623
-168.27	0.3864		-587.49	0.0028184
-176.2	0.3845		-620.87	0.0025704
-184.5	0.3827		-654.64	0.0022909
-193.2	0.3808		-691.83	0.0020893
-202.3	0.3789		-732.82	0.0019055
-212.32	0.377		-774.46	0.0017378
-221.82	0.375		-1	0.83176
-232.27	0.373		-1.23	0.81283
-241.55	0.371		-2	0.77625
-251.19	0.3689		-3.02	0.72444
-262.42	0.3669		-3.98	0.69183
-274.16	0.3647		-5.01	0.67608
-285.76	0.3626		-7.59	0.66069
-297.17	0.3604		-10	0.58884
-309.03	0.3581
-321.37	0.3558
-334.2	0.3535
-346.74	0.3511
-358.1	0.3486
-369.83	0.3461
-382.82	0.3435
-398.11	0.3408
-415.91	0.338
-435.51	0.3351
-457.09	0.3321
-479.73	0.3292
-503.5	0.3262
-529.66	0.3234
-557.19	0.3205
-587.49	0.3176
-620.87	0.3147
-654.64	0.3117
-691.83	0.3087
-732.82	0.3057
-774.46	0.3026

## Sheet: Cal9
h	theta		h	K
[cm]	[-]		[cm]	[cm/d]
-0.01	0.3182		-146.55	0.38905
-1.2	0.3175		-149.97	0.34674
-2.75	0.3167		-154.17	0.31623
-4.34	0.3159		-158.12	0.2884
-6.07	0.315		-162.18	0.25704
-7.98	0.314		-166.72	0.23442
-10.14	0.313		-171.4	0.22909
-12.53	0.3119		-176.6	0.20417
-15.31	0.3108		-181.97	0.17783
-18.66	0.3096		-187.5	0.16218
-22.34	0.3084		-193.64	0.14791
-26.24	0.3072		-199.53	0.1349
-30.76	0.3059		-206.06	0.12303
-35.16	0.3047		-213.3	0.10965
-40.27	0.3034		-220.29	0.097724
-46.56	0.3022		-227.51	0.085114
-52.36	0.3008		-235.5	0.075858
-57.94	0.2995		-243.78	0.070795
-63.24	0.2981		-251.77	0.067608
-58.21	0.2967		-259.42	0.060256
-53.46	0.2953		-268.53	0.051286
-57.54	0.2938		-277.97	0.045709
-57.28	0.2923		-287.74	0.039811
-59.16	0.2908		-297.85	0.036308
-64.27	0.2892		-309.74	0.031623
-69.98	0.2877		-322.11	0.028184
-75.34	0.2861		-335.74	0.025119
-79.43	0.2845		-350.75	0.021878
-84.72	0.2829		-367.28	0.019055
-89.13	0.2812		-384.59	0.016596
-93.11	0.2795		-403.65	0.014125
-97.05	0.2779		-424.62	0.012023
-101.62	0.2761		-448.75	0.01
-105.44	0.2744		-474.24	0.0083176
-108.64	0.2726		-502.34	0.0069183
-111.43	0.2708		-535.8	0.0057544
-114.29	0.269		-571.48	0.0046774
-117.49	0.2671		-609.54	0.0039811
-120.5	0.2652		-651.63	0.0033113
-123.31	0.2632		-699.84	0.0027542
-126.47	0.2612		-753.36	0.0021878
-129.42	0.2592		-809.1	0.0019055
-132.13	0.2571		-1.02	25.704
-134.59	0.2549		-2	23.988
-137.09	0.2527		-3.02	19.953
-139.96	0.2505		-3.98	17.378
-142.89	0.2483		-5.01	15.488
-146.55	0.2461		-6.03	14.791
-149.97	0.2438		-7.08	13.49
-154.17	0.2415		-7.94	12.882
-158.12	0.2391		-8.91	12.882
-162.18	0.2367
-166.72	0.2342
-171.4	0.2317
-176.6	0.2292
-181.97	0.2266
-187.5	0.224
-193.64	0.2213
-199.53	0.2187
-206.06	0.216
-213.3	0.2132
-220.29	0.2105
-227.51	0.2077
-235.5	0.205
-243.78	0.2022
-251.77	0.1994
-259.42	0.1967
-268.53	0.1939
-277.97	0.1913
-287.74	0.1886
-297.85	0.1859
-309.74	0.1831
-322.11	0.1802
-335.74	0.1773
-350.75	0.1743
-367.28	0.1711
-384.59	0.168
-403.65	0.1647
-424.62	0.1614
-448.75	0.1581
-474.24	0.1547
-502.34	0.1512
-535.8	0.1478
-571.48	0.1443
-609.54	0.1408
-651.63	0.1372
-699.84	0.1337
-753.36	0.1302
-809.1	0.1267

## Sheet: Cal10
h	theta		h	K
[cm]	[-]		[cm]	[cm/d]
-0.01	0.3674		-123.88	0.39811
-0.01	0.3673		-128.53	0.36308
-0.01	0.3672		-133.66	0.33113
-0.01	0.367		-139	0.31623
-0.01	0.3667		-144.54	0.2884
-1.04	0.3664		-151.01	0.27542
-1.32	0.366		-157.4	0.26915
-1.39	0.3655		-164.06	0.24547
-1.57	0.365		-172.19	0.20893
-1.97	0.3644		-181.13	0.17378
-2.47	0.3637		-191.43	0.15488
-2.74	0.363		-203.24	0.12589
-2.76	0.3621		-216.27	0.10233
-2.8	0.3613		-231.21	0.089125
-2.86	0.3603		-247.17	0.079433
-2.93	0.3593		-264.24	0.069183
-3.03	0.3582		-281.84	0.058884
-3.16	0.357		-301.3	0.050119
-3.3	0.3557		-320.63	0.044668
-3.41	0.3544		-341.19	0.037154
-3.76	0.353		-363.92	0.0302
-4.86	0.3516		-388.15	0.023988
-5.75	0.35		-414.95	0.019055
-6.56	0.3484		-443.61	0.014791
-8.67	0.3467		-474.24	0.01
-10.35	0.3449		-508.16	0.0069183
-11.86	0.3431		-545.76	0.0056234
-14.39	0.3412		-584.79	0.0054954
-17.14	0.3392		-628.06	0.0058884
-19.19	0.3371		-674.53	0.0052481
-21.04	0.335		-724.44	0.0034674
-23.07	0.3328		-774.46	0.0024547
-24.89	0.3306		-827.94	0.0017783
-27.29	0.3283		-881.05	0.0013183
-29.65	0.3259		-935.41	0.001
-31.99	0.3234		-1	15.136
-34.51	0.321		-1.23	14.791
-36.9	0.3184		-2	14.791
-39.36	0.3158		-3.02	14.791
-41.98	0.3132		-3.98	14.791
-44.57	0.3105		-5.01	14.454
-47.1	0.3078		-7.59	14.791
-49.77	0.3051		-10	12.882
-52.6	0.3024
-55.21	0.2996
-57.94	0.2969
-60.67	0.2941
-63.39	0.2914
-65.77	0.2887
-68.55	0.286
-71.61	0.2834
-74.47	0.2808
-77.45	0.2781
-80.35	0.2755
-83.75	0.2729
-87.3	0.2703
-91.2	0.2677
-95.06	0.2651
-98.4	0.2625
-102.33	0.2599
-106.17	0.2573
-110.41	0.2547
-114.82	0.252
-119.12	0.2493
-123.88	0.2465
-128.53	0.2437
-133.66	0.2409
-139	0.2379
-144.54	0.2349
-151.01	0.2318
-157.4	0.2285
-164.06	0.2252
-172.19	0.2217
-181.13	0.2182
-191.43	0.2146
-203.24	0.2108
-216.27	0.2071
-231.21	0.2032
-247.17	0.1993
-264.24	0.1953
-281.84	0.1914
-301.3	0.1873
-320.63	0.1833
-341.19	0.1793
-363.92	0.1753
-388.15	0.1713
-414.95	0.1673
-443.61	0.1634
-474.24	0.1599
-508.16	0.1568
-545.76	0.1538
-584.79	0.1505
-628.06	0.1462
-674.53	0.1411
-724.44	0.1362
-774.46	0.1321
-827.94	0.1287
-881.05	0.1258
-935.41	0.1233

## Sheet: Cal11
h	theta		h	K
[cm]	[-]		[cm]	[cm/d]
-2.35	0.3597		-78.89	0.22909
-4.52	0.3587		-84.14	0.16218
-6.92	0.3577		-90.57	0.10965
-9.82	0.3566		-98.4	0.070795
-13.09	0.3554		-107.89	0.042658
-16.44	0.3542		-119.67	0.025119
-19.5	0.3529		-133.66	0.015488
-21.28	0.3516		-150.66	0.0093325
-21.04	0.3502		-171	0.0056234
-22.18	0.3488		-195.88	0.0034674
-24.6	0.3474		-225.94	0.0021878
-25.88	0.3458		-260.62	0.0014125
-26.85	0.3442		-301.3	0.00091201
-27.86	0.3426		-349.95	0.00057544
-28.58	0.3408		-410.2	0.00035481
-27.61	0.3389		-487.53	0.00020417
-27.29	0.3369		-587.49	0.00012023
-29.11	0.3348		-1	457.09
-30.34	0.3327		-1.23	354.81
-30.83	0.3305		-2.29	275.42
-31.48	0.3282		-3.09	257.04
-32.36	0.3259		-3.89	239.88
-32.96	0.3235		-4.9	229.09
-33.5	0.321		-5.89	223.87
-33.96	0.3185		-7.08	213.8
-34.43	0.3159		-7.94	199.53
-34.91	0.3132		-9.12	190.55
-35.32	0.3105		-10	186.21
-35.65	0.3077
-36.06	0.3049
-36.39	0.302
-36.73	0.2991
-36.98	0.2961
-37.24	0.293
-37.67	0.2897
-38.19	0.2864
-38.55	0.283
-38.99	0.2795
-39.45	0.2759
-39.9	0.2722
-40.27	0.2685
-40.64	0.2647
-41.11	0.2609
-41.5	0.257
-41.88	0.2531
-42.27	0.2491
-42.66	0.2452
-43.05	0.2413
-43.45	0.2374
-43.85	0.2334
-44.36	0.2293
-44.77	0.2251
-45.29	0.2208
-45.92	0.2165
-46.56	0.212
-47.21	0.2074
-47.86	0.2028
-48.53	0.1982
-49.2	0.1936
-50	0.1891
-50.7	0.1847
-51.64	0.1803
-52.6	0.1757
-53.7	0.171
-54.83	0.1662
-56.23	0.1613
-57.68	0.1563
-59.29	0.1513
-61.24	0.1463
-63.24	0.1413
-65.61	0.1363
-68.23	0.1315
-71.12	0.1269
-74.64	0.1224
-78.89	0.1179
-84.14	0.1134
-90.57	0.1089
-98.4	0.1044
-107.89	0.0998
-119.67	0.0953
-133.66	0.0909
-150.66	0.0865
-171	0.0823
-195.88	0.0782
-225.94	0.0743
-260.62	0.0706
-301.3	0.0671
-349.95	0.064
-410.2	0.0611
-487.53	0.0587
-587.49	0.0567

## Sheet: Cal12
h	theta		h	K
[cm]	[-]		[cm]	[cm/d]
-0.01	0.3811		-60.39	0.38905
-2.85	0.3791		-63.24	0.29512
-5.73	0.3769		-66.83	0.21878
-9.04	0.3747		-71.45	0.16596
-13.46	0.3725		-76.74	0.11749
-18.41	0.3701		-82.99	0.077625
-21.83	0.3677		-90.78	0.047863
-23.88	0.3652		-99.54	0.032359
-25.64	0.3627		-112.2	0.017783
-26.42	0.3601		-129.72	0.0091201
-27.04	0.3575		-150.66	0.0048978
-27.99	0.3549		-176.6	0.0024547
-28.51	0.3522		-208.93	0.0014125
-28.97	0.3496		-247.74	0.00085114
-28.71	0.347		-293.76	0.00054954
-28.77	0.3443		-349.95	0.00035481
-29.58	0.3417		-421.7	0.00023442
-30.06	0.3391		-517.61	0.00015136
-30.62	0.3366		-645.65	9.5499e-05
-31.05	0.3341		-1	501.19
-31.33	0.3316		-1.23	478.63
-31.77	0.3292		-2	467.74
-32.21	0.3268		-3.02	467.74
-32.58	0.3245		-3.98	457.09
-33.04	0.3222		-5.01	457.09
-33.34	0.32		-7.59	446.68
-33.73	0.3178		-10	457.09
-34.04	0.3157
-34.36	0.3136
-34.75	0.3115
-35.08	0.3095
-35.48	0.3074
-35.81	0.3054
-36.22	0.3033
-36.56	0.3012
-36.98	0.299
-37.33	0.2967
-37.76	0.2944
-38.19	0.2918
-38.64	0.2891
-38.99	0.2862
-39.45	0.2831
-39.81	0.2796
-40.18	0.276
-40.55	0.2723
-41.02	0.2686
-41.5	0.2649
-41.98	0.2611
-42.46	0.2574
-42.95	0.2536
-43.45	0.2497
-44.06	0.2458
-44.67	0.2419
-45.19	0.2378
-45.81	0.2337
-46.45	0.2294
-47.1	0.2252
-47.75	0.221
-48.53	0.2167
-49.43	0.2123
-50.47	0.2079
-51.52	0.2033
-52.6	0.1986
-53.83	0.1938
-55.08	0.1887
-56.49	0.1834
-58.21	0.1777
-60.39	0.1717
-63.24	0.1655
-66.83	0.1594
-71.45	0.1533
-76.74	0.1472
-82.99	0.1411
-90.78	0.1351
-99.54	0.1292
-112.2	0.1236
-129.72	0.118
-150.66	0.1127
-176.6	0.1082
-208.93	0.1045
-247.74	0.1011
-293.76	0.098
-349.95	0.0952
-421.7	0.0925
-517.61	0.09
-645.65	0.0876

## Sheet: Test1
h	theta		h	K
[cm]	[-]		[cm]	[cm/d]
-41.115	0.3856		-185.78	0.0645654
-88.7156	0.3807		-199.526	0.0467735
-113.24	0.3763		-213.304	0.0354813
-129.718	0.3722		-227.51	0.025704
-144.212	0.3682		-241.546	0.020893
-158.489	0.3641		-255.859	0.0186209
-172.187	0.36		-269.774	0.0158489
-185.78	0.3559		-284.446	0.0144544
-199.526	0.3519		-300.608	0.0128825
-213.304	0.3479		-316.957	0.0114815
-227.51	0.3439		-333.426	0.0107152
-241.546	0.3401		-349.945	0.00977237
-255.859	0.3362		-368.978	0.00891251
-269.774	0.3324		-388.15	0.00831764
-284.446	0.3287		-409.261	0.00758578
-300.608	0.325		-433.511	0.00676083
-316.957	0.3213		-460.257	0.0060256
-333.426	0.3176		-489.779	0.00537032
-349.945	0.3139		-519.996	0.0047863
-368.978	0.3103		-552.077	0.00436516
-388.15	0.3066		-583.445	0.00416869
-409.261	0.303		-616.595	0.00380189
-433.511	0.2993		-650.13	0.00346737
-460.257	0.2957		-685.488	0.00338844
-489.779	0.2922		-719.449	0.00354813
-519.996	0.2888		-6266.14	3.54813e-05
-552.077	0.2854		-122.462	0.234423
-583.445	0.282		-128.233	0.199526
-616.595	0.2788		-134.586	0.165959
-650.13	0.2757		-142.233	0.141254
-685.488	0.2726		-150.661	0.109648
-719.449	0.2695		-159.956	0.0891251
-6266.14	0.1389		-170.608	0.0724436
-17.9473	0.3908		-181.97	0.0630957
-21.5774	0.3904		-194.536	0.0562341
-28.9068	0.3898		-208.93	0.0457088
-39.4457	0.3889		-224.905	0.0389045
-52.8445	0.3876		-242.103	0.0331131
-67.7642	0.3861		-261.818	0.0263027
-81.8465	0.3843		-283.792	0.020893
-92.045	0.3822		-307.61	0.0162181
-98.4011	0.38		-332.66	0.0134896
-103.039	0.3774		-360.579	0.0112202
-107.399	0.3747		-391.742	0.00977237
-111.429	0.3716		-430.527	0.00758578
-116.145	0.3683		-478.63	0.00549541
-122.462	0.3646		-530.884	0.0040738
-128.233	0.3606		-588.844	0.00323594
-134.586	0.3563		-651.628	0.00263027
-142.233	0.3518		-722.77	0.0020893
-150.661	0.3471		-809.096	0.00151356
-159.956	0.3422		-912.011	0.00109648
-170.608	0.3371		-5140.44	2.81838e-05
-181.97	0.3317		-88.5116	0.794328
-194.536	0.3262		-96.3829	0.630957
-208.93	0.3205		-104.713	0.436516
-224.905	0.3145		-113.501	0.295121
-242.103	0.3082		-122.744	0.245471
-261.818	0.3017		-131.826	0.218776
-283.792	0.295		-140.929	0.199526
-307.61	0.2885		-151.008	0.151356
-332.66	0.2823		-161.436	0.114815
-360.579	0.2762		-172.187	0.0977237
-391.742	0.2698		-183.231	0.0831764
-430.527	0.2627		-194.536	0.0758578
-478.63	0.255		-206.063	0.0630957
-530.884	0.2474		-218.273	0.0512861
-588.844	0.2401		-231.206	0.042658
-651.628	0.2327		-244.906	0.0354813
-722.77	0.2252		-258.821	0.030903
-809.096	0.2176		-274.157	0.025704
-912.011	0.2098		-289.734	0.0218776
-5140.44	0.1297		-306.902	0.0186209
-14.9968	0.4017		-325.087	0.0158489
-19.7697	0.4005		-344.35	0.0138038
-25.6448	0.3988		-364.754	0.011749
-33.266	0.3969		-388.15	0.00977237
-40.9261	0.3948		-414	0.00812831
-46.6659	0.3925		-440.555	0.00691831
-51.2861	0.3901		-469.894	0.0057544
-56.4937	0.3875		-502.343	0.0047863
-61.9441	0.3848		-534.564	0.00398107
-67.7642	0.382		-566.239	0.00354813
-74.3019	0.3791		-602.56	0.00309029
-81.0961	0.376		-641.21	0.00263027
-88.5116	0.3729		-4226.69	2.75423e-05
-96.3829	0.3697		-88.308	0.457088
-104.713	0.3664		-95.2796	0.323594
-113.501	0.3631		-102.565	0.269153
-122.744	0.3597		-110.154	0.218776
-131.826	0.3562		-117.22	0.190546
-140.929	0.3527		-125.026	0.165959
-151.008	0.3492		-132.739	0.141254
-161.436	0.3456		-140.929	0.123027
-172.187	0.3419		-149.624	0.0977237
-183.231	0.3382		-158.855	0.0812831
-194.536	0.3344		-168.655	0.0676083
-206.063	0.3306		-178.649	0.0549541
-218.273	0.3267		-189.234	0.0457088
-231.206	0.3228		-200.909	0.0371535
-244.906	0.3188		-213.796	0.0301995
-258.821	0.3147		-227.51	0.025704
-274.157	0.3105		-241.546	0.0223872
-289.734	0.3063		-257.04	0.0190546
-306.902	0.302		-274.789	0.0162181
-325.087	0.2976		-294.442	0.0134896
-344.35	0.2931		-317.687	0.0114815
-364.754	0.2886		-344.35	0.00933254
-388.15	0.284		-376.704	0.00758578
-414	0.2793		-414	0.00616595
-440.555	0.2747		-452.898	0.00562341
-469.894	0.2699		-496.592	0.00501187
-502.343	0.2652		-5152.29	3.23594e-05
-534.564	0.2605		-93.3254	0.275423
-566.239	0.2557		-102.565	0.239883
-602.56	0.2509		-111.429	0.199526
-641.21	0.246		-119.674	0.162181
-4226.69	0.1399		-127.938	0.134896
-5.59758	0.412		-137.088	0.109648
-14.5211	0.4103		-146.555	0.0851138
-25.0035	0.4081		-156.675	0.0724436
-35.0752	0.4056		-167.88	0.0588844
-42.2669	0.403		-179.061	0.0501187
-46.2381	0.4002		-190.985	0.0416869
-50.4661	0.3973		-204.174	0.0338844
-55.0808	0.3943		-217.771	0.0281838
-59.8412	0.3912		-232.809	0.0239883
-65.1628	0.388		-249.459	0.0204174
-70.9578	0.3848		-266.686	0.017378
-76.5597	0.3814		-285.759	0.0147911
-82.2243	0.378		-306.196	0.0128825
-88.308	0.3745		-328.095	0.0107152
-95.2796	0.3709		-353.183	0.00870964
-102.565	0.3672		-380.189	0.00724436
-110.154	0.3634		-409.261	0.0060256
-117.22	0.3594		-439.542	0.00501187
-125.026	0.3555		-473.151	0.00416869
-132.739	0.3514		-508.159	0.00346737
-140.929	0.3474		-545.758	0.00288403
-149.624	0.3432		-587.489	0.00245471
-158.855	0.3391		-632.412	0.00204174
-168.655	0.3349		-677.642	0.0017378
-178.649	0.3307		-729.458	0.00147911
-189.234	0.3264		-790.679	0.00120226
-200.909	0.3219		-859.014	0.000954993
-213.796	0.3174		-4897.79	2.23872e-05
-227.51	0.3128		-174.582	0.0676083
-241.546	0.308		-185.353	0.0616595
-257.04	0.3031		-196.336	0.057544
-274.789	0.2981		-207.491	0.0537032
-294.442	0.2931		-218.273	0.0501187
-317.687	0.288		-230.675	0.0457088
-344.35	0.2829		-242.661	0.042658
-376.704	0.2778		-254.683	0.040738
-414	0.2726		-266.686	0.0380189
-452.898	0.2675		-278.612	0.0338844
-496.592	0.2624		-291.072	0.0301995
-5152.29	0.1381		-303.389	0.0281838
-19.1867	0.3924		-315.5	0.025704
-36.3078	0.3898		-328.852	0.0213796
-51.0505	0.3869		-341.193	0.0190546
-62.5173	0.3839		-353.997	0.0169824
-73.1139	0.3806		-367.282	0.0151356
-83.3681	0.377		-381.066	0.0134896
-93.3254	0.3734		-395.367	0.0123027
-102.565	0.3696		-409.261	0.0109648
-111.429	0.3657		-423.643	0.00954993
-119.674	0.3617		-439.542	0.00851138
-127.938	0.3576		-454.988	0.00776247
-137.088	0.3534		-470.977	0.00707946
-146.555	0.3491		-487.528	0.00645654
-156.675	0.3447		-505.825	0.0057544
-167.88	0.3402		-526.017	0.00501187
-179.061	0.3357		-547.016	0.00446684
-190.985	0.331		-568.853	0.00398107
-204.174	0.3263		-592.925	0.00354813
-217.771	0.3214		-619.441	0.00323594
-232.809	0.3165		-645.654	0.00295121
-249.459	0.3114		-676.083	0.0025704
-266.686	0.3062		-707.946	0.00229087
-285.759	0.301		-743.019	0.00199526
-306.196	0.2956		-783.43	0.0017378
-328.095	0.2902		-827.942	0.00151356
-353.183	0.2848		-1142.88	0.000660693
-380.189	0.2793		-5081.59	2.88403e-05
-409.261	0.2738		-139.316	0.0630957
-439.542	0.2683		-146.555	0.057544
-473.151	0.2629		-153.815	0.0524807
-508.159	0.2574		-161.808	0.0467735
-545.758	0.252		-169.824	0.0416869
-587.489	0.2466		-178.238	0.0389045
-632.412	0.2411		-186.638	0.0363078
-677.642	0.2355		-195.434	0.0323594
-729.458	0.2298		-204.644	0.0295121
-790.679	0.2241		-213.796	0.0263027
-859.014	0.2184		-224.388	0.0234423
-4897.79	0.1361		-235.505	0.0213796
-1.39316	0.409		-247.172	0.0194984
-1.56675	0.4089		-258.821	0.018197
-1.64437	0.4089		-271.644	0.0165959
-2.02302	0.4088		-284.446	0.0154882
-2.46604	0.4087		-297.852	0.0141254
-2.81838	0.4086		-311.889	0.0128825
-3.04089	0.4084		-326.588	0.011749
-3.17687	0.4081		-341.979	0.0107152
-3.4435	0.4078		-358.096	0.00977237
-3.8815	0.4074		-375.837	0.00870964
-4.2462	0.4067		-395.367	0.00794328
-4.45656	0.406		-415.911	0.00724436
-4.68813	0.4051		-437.522	0.00660693
-4.90908	0.4042		-460.257	0.0060256
-5.02343	0.4034		-483.059	0.00562341
-5.06991	0.4025		-508.159	0.00501187
-5.188	0.4016		-534.564	0.00446684
-5.35797	0.4007		-562.341	0.0040738
-5.59758	0.3997		-591.562	0.00371535
-5.95662	0.3987		-620.869	0.00338844
-6.51628	0.3977		-653.131	0.00301995
-7.29458	0.3966		-687.068	0.00275423
-8.24138	0.3955		-724.436	0.00239883
-9.33254	0.3944		-763.836	0.00213796
-10.4954	0.3932		-807.235	0.00186209
-11.749	0.392		-855.067	0.00162181
-12.8825	0.3908		-1174.9	0.000562341
-13.366	0.3896		-5470.16	2.51189e-05
-14.4544	0.3883		-143.88	0.0870964
-16.293	0.387		-149.624	0.0758578
-18.197	0.3857		-155.239	0.0691831
-20.4174	0.3844		-161.436	0.0630957
-22.6986	0.383		-167.494	0.0562341
-25.1768	0.3816		-174.582	0.0489779
-27.8612	0.3801		-181.552	0.0436516
-30.5492	0.3787		-189.234	0.0389045
-33.266	0.3771		-196.789	0.0346737
-36.141	0.3755		-205.116	0.030903
-39.4457	0.3739		-213.796	0.0275423
-43.0527	0.3722		-222.331	0.0245471
-46.2381	0.3704		-231.206	0.0218776
-50.0035	0.3685		-240.991	0.0194984
-54.9541	0.3667		-251.189	0.0177828
-59.4292	0.3647		-261.818	0.0162181
-64.2688	0.3628		-272.27	0.0147911
-69.6627	0.3608		-283.792	0.0131826
-75.1623	0.3588		-295.121	0.0123027
-81.6582	0.3567		-307.61	0.0109648
-89.1251	0.3546		-319.89	0.00977237
-97.051	0.3525		-334.195	0.00870964
-105.682	0.3503		-348.337	0.00794328
-115.08	0.3481		-363.915	0.00707946
-124.165	0.3458		-380.189	0.00630957
-133.352	0.3435		-397.192	0.00562341
-143.88	0.3411		-414.954	0.00501187
-153.462	0.3387		-432.514	0.00457088
-163.305	0.3362		-451.856	0.00416869
-174.582	0.3336		-472.063	0.00371535
-185.353	0.331		-493.174	0.00338844
-196.336	0.3283		-515.229	0.00301995
-207.491	0.3255		-538.27	0.00275423
-218.273	0.3227		-563.638	0.00245471
-230.675	0.3197		-590.201	0.00213796
-242.661	0.3166		-618.016	0.00194984
-254.683	0.3134		-647.143	0.0017378
-266.686	0.3102		-677.642	0.00158489
-278.612	0.3069		-706.318	0.00147911
-291.072	0.3036		-4886.52	2.23872e-05
-303.389	0.3002
-315.5	0.2969
-328.852	0.2935
-341.193	0.2902
-353.997	0.2869
-367.282	0.2836
-381.066	0.2803
-395.367	0.2771
-409.261	0.2739
-423.643	0.2708
-439.542	0.2677
-454.988	0.2647
-470.977	0.2616
-487.528	0.2585
-505.825	0.2553
-526.017	0.2521
-547.016	0.2488
-568.853	0.2455
-592.925	0.2421
-619.441	0.2387
-645.654	0.2352
-676.083	0.2316
-707.946	0.228
-743.019	0.2242
-783.43	0.2203
-827.942	0.2162
-1142.88	0.1939
-5081.59	0.1227
-8.91251	0.4137
-9.03649	0.4137
-9.24698	0.4137
-9.66051	0.4137
-10.1158	0.4136
-10.4232	0.4136
-10.9144	0.4135
-11.508	0.4133
-12.0504	0.4131
-12.9718	0.4129
-14.5881	0.4126
-15.8125	0.4121
-16.8267	0.4115
-18.3231	0.4108
-19.6336	0.4101
-21.1349	0.4094
-22.8034	0.4087
-24.322	0.408
-26.1818	0.4072
-28.119	0.4064
-30.1995	0.4056
-32.434	0.4047
-34.7536	0.4038
-37.0681	0.4029
-39.7192	0.4019
-42.5598	0.4009
-45.4988	0.3998
-48.7528	0.3988
-51.9996	0.3977
-55.0808	0.3966
-57.8096	0.3954
-59.7035	0.3942
-61.9441	0.393
-64.7143	0.3918
-67.1429	0.3905
-69.6627	0.3892
-72.277	0.3878
-74.6449	0.3864
-76.913	0.385
-77.6247	0.3835
-79.2501	0.382
-82.4138	0.3804
-84.918	0.3788
-86.896	0.3771
-89.5365	0.3753
-92.683	0.3735
-95.7194	0.3717
-99.3116	0.3699
-102.802	0.368
-106.17	0.366
-110.154	0.364
-114.815	0.362
-120.226	0.36
-126.183	0.3579
-132.739	0.3557
-139.316	0.3535
-146.555	0.3513
-153.815	0.349
-161.808	0.3467
-169.824	0.3443
-178.238	0.3418
-186.638	0.3393
-195.434	0.3367
-204.644	0.3341
-213.796	0.3314
-224.388	0.3286
-235.505	0.3258
-247.172	0.3228
-258.821	0.3198
-271.644	0.3167
-284.446	0.3135
-297.852	0.3103
-311.889	0.307
-326.588	0.3037
-341.979	0.3003
-358.096	0.297
-375.837	0.2936
-395.367	0.2902
-415.911	0.2869
-437.522	0.2834
-460.257	0.28
-483.059	0.2766
-508.159	0.2732
-534.564	0.2698
-562.341	0.2664
-591.562	0.263
-620.869	0.2596
-653.131	0.2561
-687.068	0.2525
-724.436	0.2489
-763.836	0.2453
-807.235	0.2416
-855.067	0.2379
-1174.9	0.2145
-5470.16	0.1346
-0.01	0.4275
-1.74181	0.4272
-3.5156	0.4267
-5.02343	0.4262
-6.01174	0.4257
-6.62217	0.4251
-7.11214	0.4244
-7.96159	0.4237
-9.39723	0.4229
-9.37562	0.4221
-8.59014	0.4213
-11.1686	0.4203
-16.2555	0.4194
-21.4289	0.4184
-22.4388	0.4173
-18.7068	0.4162
-16.7494	0.415
-17.9887	0.4138
-19.8609	0.4126
-21.677	0.4113
-23.8781	0.41
-25.5859	0.4087
-27.6058	0.4073
-30.2691	0.4059
-33.037	0.4045
-35.5631	0.403
-38.1066	0.4015
-40.2717	0.4
-42.658	0.3984
-46.1318	0.3968
-49.4311	0.3952
-52.8445	0.3935
-56.3638	0.3918
-59.7035	0.3901
-63.0957	0.3884
-66.5273	0.3866
-70.4693	0.3847
-74.3019	0.3829
-78.1628	0.381
-81.6582	0.379
-83.946	0.377
-86.4968	0.3749
-90.5733	0.3727
-94.4061	0.3706
-98.4011	0.3683
-102.565	0.3661
-106.66	0.3638
-110.662	0.3614
-114.815	0.359
-119.124	0.3566
-123.027	0.3541
-127.644	0.3516
-133.66	0.349
-138.676	0.3463
-143.88	0.3436
-149.624	0.3409
-155.239	0.3381
-161.436	0.3353
-167.494	0.3324
-174.582	0.3295
-181.552	0.3265
-189.234	0.3235
-196.789	0.3205
-205.116	0.3174
-213.796	0.3144
-222.331	0.3113
-231.206	0.3082
-240.991	0.305
-251.189	0.3019
-261.818	0.2987
-272.27	0.2955
-283.792	0.2922
-295.121	0.2889
-307.61	0.2856
-319.89	0.2823
-334.195	0.279
-348.337	0.2756
-363.915	0.2722
-380.189	0.2689
-397.192	0.2655
-414.954	0.2621
-432.514	0.2586
-451.856	0.2552
-472.063	0.2518
-493.174	0.2484
-515.229	0.245
-538.27	0.2416
-563.638	0.2382
-590.201	0.2347
-618.016	0.2312
-647.143	0.2278
-677.642	0.2242
-706.318	0.2207
-4886.52	0.128
-1.09648e+06	0.0171
-50118.7	0.0575
-9332.54	0.1
-2951.21	0.1449
-1.09648e+06	0.0171
-50118.7	0.0575
-9332.54	0.1
-2951.21	0.1449
-1.09648e+06	0.0183
-50118.7	0.0616
-9332.54	0.1056
-2951.21	0.1519
-1380.38	0.1955
-1.09648e+06	0.0183
-50118.7	0.0616
-9332.54	0.1056
-2951.21	0.1519
-1380.38	0.1955
-1.09648e+06	0.0183
-50118.7	0.0616
-9332.54	0.1056
-2951.21	0.1519
-645654	0.027
-69183.1	0.065
-23442.3	0.091
-17782.8	0.096

## Sheet: Test2
h	theta		h	K
[cm]	[-]		[cm]	[cm/d]
-6.93426	0.3357		-219.28	0.0616595
-15.0314	0.3336		-232.274	0.0512861
-25.704	0.3313		-246.037	0.042658
-42.1697	0.3288		-260.016	0.0389045
-55.847	0.3262		-274.789	0.0346737
-63.6796	0.3236		-291.743	0.0288403
-68.8652	0.321		-309.742	0.0251189
-71.9449	0.3182		-329.61	0.020893
-75.5092	0.3153		-351.56	0.0169824
-79.2501	0.3123		-377.572	0.0134896
-81.8465	0.3093		-408.319	0.0107152
-84.7227	0.3061		-442.588	0.00912011
-87.7001	0.3029		-479.733	0.00776247
-90.9913	0.2996		-521.195	0.00676083
-94.4061	0.2964		-567.545	0.0057544
-97.499	0.2931		-618.016	0.00489779
-100.693	0.2898		-674.528	0.00416869
-103.992	0.2864		-737.904	0.00354813
-107.152	0.2831		-794.328	0.00263027
-110.154	0.2797		-5915.62	1.90546e-05
-113.501	0.2763		-130.017	0.30903
-116.95	0.2729		-138.995	0.251189
-120.504	0.2695		-148.936	0.199526
-123.88	0.266		-161.808	0.154882
-127.644	0.2624		-178.238	0.11749
-131.522	0.2589		-199.067	0.0870964
-135.519	0.2552		-224.388	0.0588844
-139.637	0.2515		-255.859	0.0398107
-144.212	0.2478		-295.801	0.025704
-148.936	0.2441		-349.14	0.0162181
-153.462	0.2405		-423.643	0.01
-158.489	0.237		-535.797	0.00537032
-163.682	0.2335		-5508.08	1.77828e-05
-168.655	0.2302		-260.615	0.0660693
-174.181	0.2269		-287.74	0.0457088
-180.717	0.2236		-321.366	0.0301995
-188.365	0.2201		-363.915	0.0204174
-197.242	0.2164		-417.83	0.0141254
-207.97	0.2124		-486.407	0.00954993
-219.28	0.2083		-574.116	0.00616595
-232.274	0.2043		-683.912	0.0040738
-246.037	0.2005		-5321.08	1.90546e-05
-260.016	0.1968		-161.436	0.234423
-274.789	0.1932		-173.78	0.186209
-291.743	0.1895		-187.499	0.151356
-309.742	0.1859		-203.704	0.104713
-329.61	0.1823		-222.844	0.0707946
-351.56	0.1787		-246.037	0.0501187
-377.572	0.1751		-274.789	0.0346737
-408.319	0.1715		-309.742	0.0229087
-442.588	0.168		-351.56	0.0162181
-479.733	0.1644		-407.38	0.0104713
-521.195	0.1608		-484.172	0.00630957
-567.545	0.1572		-584.79	0.00371535
-618.016	0.1536		-714.496	0.00229087
-674.528	0.1499		-877.001	0.00147911
-737.904	0.1462		-116.413	0.40738
-794.328	0.1425		-122.744	0.323594
-5915.62	0.073		-129.718	0.251189
-2.12814	0.3725		-137.721	0.190546
-2.8119	0.372		-147.231	0.141254
-4.64515	0.3711		-157.761	0.112202
-8.24138	0.3698		-169.824	0.0870964
-13.3352	0.3681		-184.927	0.0630957
-19.1867	0.366		-203.236	0.0467735
-27.0396	0.3636		-223.872	0.0354813
-34.5939	0.3609		-248.313	0.0263027
-39.6278	0.358		-276.694	0.0204174
-43.6516	0.3548		-308.319	0.0158489
-47.5335	0.3511		-346.737	0.0109648
-51.6416	0.3471		-396.278	0.00812831
-54.7016	0.3428		-454.988	0.00588844
-57.9429	0.3382		-529.663	0.00416869
-62.3735	0.3333		-623.735	0.00288403
-66.5273	0.3281		-6025.6	1.94984e-05
-70.6318	0.3228		-208.449	0.060256
-74.131	0.3172		-217.771	0.0524807
-77.983	0.3113		-226.986	0.0467735
-82.4138	0.3052		-236.048	0.0416869
-86.6962	0.2987		-246.604	0.0363078
-91.622	0.2919		-258.821	0.0316228
-97.051	0.285		-271.019	0.0275423
-102.329	0.2783		-283.792	0.0251189
-107.895	0.2716		-297.852	0.0218776
-114.025	0.2645		-314.051	0.0190546
-121.619	0.2565		-331.894	0.0154882
-130.017	0.2483		-352.371	0.0138038
-138.995	0.2406		-374.973	0.0120226
-148.936	0.2329		-400.867	0.01
-161.808	0.2249		-429.536	0.00870964
-178.238	0.2167		-461.318	0.0074131
-199.067	0.2082		-497.737	0.00630957
-224.388	0.1994		-538.27	0.00524807
-255.859	0.1903		-586.138	0.0042658
-295.801	0.1813		-639.735	0.00354813
-349.14	0.172		-704.693	0.00288403
-423.643	0.162		-785.236	0.00229087
-535.797	0.1512		-862.979	0.00229087
-5508.08	0.0721		-5272.3	1.58489e-05
-3.41979	0.3546		-213.796	0.0724436
-12.8233	0.3525		-220.293	0.0616595
-26.0615	0.3497		-226.464	0.0512861
-37.1535	0.3466		-233.346	0.0436516
-45.1856	0.3432		-241.546	0.0371535
-51.5229	0.3395		-251.189	0.0316228
-57.6766	0.3357		-261.216	0.0269153
-63.5331	0.3316		-272.27	0.0239883
-68.8652	0.3274		-284.446	0.0204174
-74.6449	0.3231		-297.852	0.0177828
-79.7995	0.3186		-313.329	0.0154882
-84.3335	0.314		-328.852	0.0138038
-88.5116	0.3093		-345.939	0.0123027
-92.8966	0.3045		-366.438	0.0104713
-97.7237	0.2996		-389.045	0.00912011
-102.329	0.2945		-413.048	0.00812831
-106.905	0.2893		-439.542	0.00724436
-111.686	0.2841		-469.894	0.00630957
-117.22	0.2786		-498.884	0.0057544
-122.744	0.273		-535.797	0.00489779
-127.644	0.2672		-582.103	0.00416869
-133.045	0.2612		-628.058	0.00371535
-139.637	0.2551		-682.339	0.00323594
-146.555	0.2488		-744.732	0.00269154
-154.882	0.2425		-812.831	0.00229087
-164.059	0.2361		-887.156	0.00199526
-174.181	0.2297		-5970.35	2.04174e-05
-185.78	0.2232		-195.434	0.060256
-200.447	0.2167		-204.644	0.0501187
-217.27	0.2102		-214.783	0.0436516
-237.137	0.2035		-225.944	0.0363078
-260.615	0.1968		-238.781	0.030903
-287.74	0.19		-252.348	0.0275423
-321.366	0.183		-267.301	0.0234423
-363.915	0.1759		-284.446	0.0194984
-417.83	0.1687		-304.789	0.0158489
-486.407	0.1612		-328.095	0.0128825
-574.116	0.1538		-355.631	0.0107152
-683.912	0.1464		-388.15	0.00851138
-5321.08	0.0726		-426.58	0.00676083
-4.7863	0.3634		-472.063	0.00549541
-11.508	0.3599		-524.807	0.00436516
-19.9526	0.3554		-586.138	0.00338844
-27.5423	0.3504		-657.658	0.00263027
-35.5631	0.345		-734.514	0.00223872
-42.462	0.3394		-5688.53	1.65959e-05
-46.1318	0.3336		-183.231	0.0616595
-50.6991	0.3277		-192.309	0.0537032
-58.0764	0.3218		-201.837	0.0467735
-61.5177	0.3161		-212.814	0.040738
-61.9441	0.3105		-224.388	0.0354813
-66.9885	0.3047		-237.684	0.0295121
-74.3019	0.2985		-252.93	0.0251189
-79.4328	0.2922		-269.153	0.020893
-83.5603	0.2857		-285.759	0.017378
-87.9023	0.2792		-305.492	0.0147911
-92.683	0.2726		-328.852	0.0123027
-97.2747	0.266		-353.997	0.0102329
-102.802	0.2594		-381.944	0.00851138
-107.895	0.2527		-414.954	0.00676083
-114.551	0.2458		-453.942	0.00537032
-123.31	0.2388		-495.45	0.00446684
-132.434	0.2319		-538.27	0.00389045
-141.906	0.225		-587.489	0.00323594
-151.008	0.2183		-645.654	0.00269154
-161.436	0.2118		-714.496	0.0020893
-173.78	0.2053		-801.678	0.00154882
-187.499	0.1987		-1166.81	0.000676083
-203.704	0.192		-5727.96	1.7378e-05
-222.844	0.1851		-0.001	31.6228
-246.037	0.1778
-274.789	0.1703
-309.742	0.1625
-351.56	0.1547
-407.38	0.1468
-484.172	0.1387
-584.79	0.1308
-714.496	0.1232
-877.001	0.116
-3.2961	0.3606
-13.3045	0.3568
-27.6058	0.3524
-41.2098	0.348
-55.5904	0.3435
-56.4937	0.3389
-53.3335	0.3342
-59.2925	0.3294
-63.387	0.3245
-67.2977	0.3194
-71.1214	0.3143
-74.4732	0.309
-77.8037	0.3035
-81.2831	0.298
-84.7227	0.2923
-88.1049	0.2865
-91.8333	0.2806
-95.9401	0.2745
-100.462	0.2684
-104.954	0.2621
-110.408	0.2556
-116.413	0.2491
-122.744	0.2426
-129.718	0.2361
-137.721	0.2297
-147.231	0.2232
-157.761	0.2166
-169.824	0.2099
-184.927	0.2031
-203.236	0.1962
-223.872	0.1894
-248.313	0.1828
-276.694	0.1764
-308.319	0.1701
-346.737	0.1639
-396.278	0.1578
-454.988	0.1517
-529.663	0.1455
-623.735	0.1393
-6025.6	0.0677
-0.01	0.3354
-2.61818	0.3347
-4.60257	0.334
-6.5013	0.3331
-8.72971	0.3324
-11.722	0.3316
-15.0661	0.3309
-18.7499	0.3301
-22.8034	0.3292
-27.227	0.3284
-32.3594	0.3275
-38.4592	0.3265
-45.9198	0.3256
-50.4661	0.3246
-55.7186	0.3236
-62.9506	0.3226
-68.0769	0.3215
-72.6106	0.3205
-76.5597	0.3194
-79.9834	0.3182
-83.1764	0.3171
-85.7038	0.3159
-87.9023	0.3148
-89.5365	0.3135
-90.9913	0.3123
-89.5365	0.311
-89.5365	0.3097
-92.4698	0.3083
-93.9723	0.3069
-95.2796	0.3054
-96.3829	0.3039
-97.7237	0.3023
-98.4011	0.3006
-99.3116	0.2989
-101.158	0.2971
-102.565	0.2953
-103.753	0.2935
-105.439	0.2916
-106.905	0.2897
-107.647	0.2877
-109.144	0.2857
-111.944	0.2837
-113.763	0.2816
-115.611	0.2794
-118.032	0.2773
-119.95	0.275
-121.619	0.2727
-123.595	0.2704
-126.183	0.268
-128.529	0.2655
-131.22	0.2629
-133.66	0.2603
-135.519	0.2576
-138.357	0.2549
-142.233	0.252
-145.881	0.249
-149.968	0.2459
-154.17	0.2427
-158.489	0.2395
-163.305	0.2362
-168.267	0.2328
-173.78	0.2295
-179.887	0.2261
-185.78	0.2228
-192.752	0.2195
-200.447	0.2162
-208.449	0.213
-217.771	0.2097
-226.986	0.2064
-236.048	0.2032
-246.604	0.2001
-258.821	0.197
-271.019	0.194
-283.792	0.1909
-297.852	0.1878
-314.051	0.1846
-331.894	0.1813
-352.371	0.1779
-374.973	0.1746
-400.867	0.1712
-429.536	0.1677
-461.318	0.1642
-497.737	0.1606
-538.27	0.1569
-586.138	0.1532
-639.735	0.1494
-704.693	0.1455
-785.236	0.1414
-862.979	0.1372
-5272.3	0.0703
-3.53997	0.3222
-3.74111	0.3222
-3.98107	0.3222
-4.21697	0.3221
-4.42588	0.322
-4.59198	0.3219
-4.69894	0.3218
-4.77529	0.3216
-4.85289	0.3213
-4.96592	0.321
-5.48277	0.3206
-6.20869	0.3201
-6.59174	0.3194
-6.95024	0.3187
-7.46449	0.3179
-8.10961	0.3172
-9.22571	0.3164
-11.1429	0.3157
-13.8357	0.3149
-16.9044	0.3141
-19.9986	0.3132
-23.0144	0.3123
-25.7632	0.3114
-24.7172	0.3105
-25.6448	0.3096
-31.6957	0.3086
-37.9315	0.3076
-44.5656	0.3066
-51.88	0.3055
-60.1174	0.3045
-63.6796	0.3034
-67.6083	0.3023
-74.9894	0.3012
-79.6159	0.3
-83.7529	0.2989
-87.7001	0.2977
-90.1571	0.2964
-90.9913	0.2952
-91.8333	0.2939
-94.189	0.2926
-95.7194	0.2913
-97.499	0.2899
-100.231	0.2884
-102.565	0.2869
-104.713	0.2854
-106.17	0.2837
-107.647	0.2821
-110.408	0.2803
-113.24	0.2786
-116.145	0.2768
-117.761	0.275
-119.95	0.2731
-123.88	0.2713
-126.474	0.2693
-129.122	0.2674
-132.739	0.2654
-136.773	0.2634
-140.281	0.2613
-143.549	0.2592
-147.571	0.257
-152.055	0.2548
-156.675	0.2526
-161.065	0.2503
-165.577	0.2479
-170.216	0.2455
-174.181	0.243
-179.061	0.2405
-182.81	0.2378
-187.499	0.2351
-193.197	0.2323
-198.153	0.2294
-203.236	0.2264
-208.449	0.2234
-213.796	0.2203
-220.293	0.2171
-226.464	0.2139
-233.346	0.2107
-241.546	0.2074
-251.189	0.2042
-261.216	0.201
-272.27	0.1978
-284.446	0.1947
-297.852	0.1915
-313.329	0.1884
-328.852	0.1852
-345.939	0.182
-366.438	0.1789
-389.045	0.1757
-413.048	0.1726
-439.542	0.1694
-469.894	0.1662
-498.884	0.163
-535.797	0.1596
-582.103	0.1563
-628.058	0.1528
-682.339	0.1493
-744.732	0.1458
-812.831	0.1422
-887.156	0.1386
-5970.35	0.0715
-0.01	0.3595
-1.01859	0.3592
-2.42103	0.3586
-3.86367	0.3579
-5.57186	0.3572
-7.2778	0.3565
-9.35406	0.3557
-12.0781	0.355
-15.1008	0.3542
-18.5353	0.3534
-22.2331	0.3526
-25.3513	0.3517
-27.1019	0.3508
-30.3389	0.3498
-35.6451	0.3488
-40.738	0.3478
-44.978	0.3468
-47.863	0.3457
-51.0505	0.3447
-54.8277	0.3435
-57.1479	0.3424
-58.6138	0.3412
-60.6736	0.34
-62.3735	0.3388
-63.9735	0.3376
-65.7658	0.3363
-66.5273	0.3349
-67.2977	0.3336
-69.024	0.3321
-70.4693	0.3307
-71.4496	0.3291
-72.277	0.3275
-73.1139	0.3258
-74.131	0.3241
-75.3356	0.3224
-76.5597	0.3206
-77.4462	0.3187
-77.983	0.3169
-78.886	0.3149
-80.7235	0.313
-82.4138	0.311
-84.3335	0.309
-86.0994	0.3069
-87.7001	0.3048
-89.5365	0.3026
-91.2011	0.3003
-92.8966	0.298
-94.8418	0.2957
-96.8278	0.2933
-98.6279	0.2908
-100.462	0.2882
-102.565	0.2856
-104.713	0.2829
-107.152	0.28
-109.901	0.2771
-112.46	0.2741
-114.815	0.271
-117.49	0.2679
-120.226	0.2647
-123.027	0.2614
-126.183	0.2581
-129.42	0.2548
-133.352	0.2515
-137.404	0.2481
-141.579	0.2447
-146.218	0.2413
-151.008	0.2379
-155.955	0.2345
-161.436	0.2311
-167.109	0.2278
-173.38	0.2245
-179.887	0.2212
-187.068	0.2178
-195.434	0.2144
-204.644	0.2108
-214.783	0.2072
-225.944	0.2036
-238.781	0.1999
-252.348	0.1962
-267.301	0.1924
-284.446	0.1885
-304.789	0.1845
-328.095	0.1804
-355.631	0.1761
-388.15	0.1717
-426.58	0.1672
-472.063	0.1625
-524.807	0.1577
-586.138	0.1529
-657.658	0.1481
-734.514	0.1434
-5688.53	0.0698
-0.01	0.3711
-1.52405	0.3707
-2.34423	0.3701
-3.02691	0.3694
-3.52371	0.3687
-3.8815	0.3679
-4.25598	0.3671
-4.76431	0.3661
-5.29663	0.3651
-6.19441	0.364
-7.53356	0.3629
-8.95365	0.3617
-10.5196	0.3604
-12.2744	0.3591
-14.2561	0.3577
-14.4212	0.3563
-15.7036	0.3549
-17.7011	0.3534
-19.6336	0.3519
-23.5505	0.3504
-27.1019	0.3488
-30.3389	0.3473
-33.3426	0.3457
-37.4973	0.3441
-42.8549	0.3424
-47.9733	0.3408
-53.4564	0.3391
-50.5825	0.3374
-48.1948	0.3356
-52.8445	0.3338
-55.4626	0.332
-58.2103	0.3301
-60.256	0.3281
-61.9441	0.326
-63.8263	0.3239
-65.7658	0.3217
-67.7642	0.3194
-69.9842	0.3171
-71.7794	0.3147
-72.9458	0.3123
-74.6449	0.3098
-76.5597	0.3072
-78.1628	0.3046
-80.1678	0.3018
-82.2243	0.2991
-84.1395	0.2962
-85.9014	0.2933
-88.1049	0.2903
-90.3649	0.2873
-92.4698	0.2842
-94.6237	0.281
-96.8278	0.2779
-99.0832	0.2747
-101.391	0.2714
-103.753	0.2682
-106.414	0.2649
-109.648	0.2615
-112.72	0.2582
-115.878	0.2547
-119.399	0.2513
-123.027	0.2478
-127.35	0.2443
-132.13	0.2407
-137.088	0.2371
-142.561	0.2336
-147.911	0.2299
-153.815	0.2263
-160.325	0.2227
-167.494	0.2191
-174.985	0.2155
-183.231	0.2118
-192.309	0.2081
-201.837	0.2044
-212.814	0.2006
-224.388	0.1968
-237.684	0.1929
-252.93	0.1889
-269.153	0.1849
-285.759	0.1809
-305.492	0.1769
-328.852	0.1729
-353.997	0.1689
-381.944	0.1649
-414.954	0.1609
-453.942	0.1568
-495.45	0.1528
-538.27	0.1488
-587.489	0.1447
-645.654	0.1407
-714.496	0.1366
-801.678	0.1325
-1166.81	0.1198
-5727.96	0.0675
-1.09648e+06	0.01
-23442.3	0.0404
-6760.83	0.0708
-2754.23	0.101
-1.12202e+06	0.0101
-23988.3	0.0404
-6760.83	0.0708
-2511.89	0.101
-724.436	0.1319
-1.12202e+06	0.0101
-23988.3	0.0404
-6760.83	0.0708
-2511.89	0.101
-724.436	0.1319
-1.12202e+06	0.0088
-23988.3	0.0354
-6760.83	0.0619
-2511.89	0.0884
-724.436	0.1154
-1.12202e+06	0.0098
-23988.3	0.0392
-6760.83	0.0686
-2511.89	0.0978
-724.436	0.1278

## Sheet: Test3
h	theta		h	K
[cm]	[-]		[cm]	[cm/d]
-8.91251	0.3296		-64.4169	0.512861
-15.5597	0.3259		-71.7794	0.288403
-20.9894	0.3214		-82.2243	0.128825
-26.6073	0.3166		-99.0832	0.0446684
-29.2415	0.3114		-128.529	0.0147911
-30.903	0.3056		-181.552	0.0047863
-32.3594	0.2993		-277.332	0.00144544
-33.4195	0.2928		-451.856	0.000398107
-34.435	0.2861		-3845.92	1e-05
-35.3997	0.2793		-66.0693	0.363078
-36.0579	0.2722		-74.9894	0.17378
-36.5595	0.265		-88.308	0.0691831
-36.9828	0.2576		-110.662	0.0234423
-37.325	0.25		-151.356	0.00676083
-37.7572	0.2424		-225.944	0.0018197
-38.1944	0.2349		-367.282	0.000549541
-38.6367	0.2277		-3990.25	9.77237e-06
-39.0841	0.2205		-80.3526	0.141254
-39.5367	0.2129		-87.7001	0.0891251
-40.1791	0.2047		-97.499	0.0537032
-40.8319	0.1968		-110.408	0.0301995
-41.4	0.1897		-127.057	0.0169824
-42.0727	0.1828		-149.624	0.00954993
-42.9536	0.1757		-179.473	0.00549541
-43.9542	0.1684		-218.776	0.00331131
-45.2898	0.1609		-271.019	0.0017378
-46.9894	0.1533		-340.408	0.000954993
-49.0908	0.1455		-434.51	0.000537032
-51.7607	0.1374		-566.239	0.000263027
-54.9541	0.1293		-421.697	0.00057544
-59.1562	0.1211		-39.9945	4.7863
-64.4169	0.1128		-40.6443	4.67735
-71.7794	0.1041		-42.1697	4.16869
-82.2243	0.0952		-43.1519	3.89045
-99.0832	0.0863		-44.157	3.46737
-128.529	0.0769		-45.3942	2.95121
-181.552	0.0671		-47.0977	2.5704
-277.332	0.058		-49.204	2.13796
-451.856	0.0506		-51.88	1.58489
-3845.92	0.03		-55.335	1.02329
-4.0738	0.37		-60.256	0.630957
-11.3763	0.3657		-66.9885	0.338844
-21.0378	0.3606		-76.7361	0.154882
-24.2661	0.3552		-91.622	0.0588844
-26.1216	0.3491		-114.815	0.0218776
-28.9068	0.3425		-148.936	0.00812831
-30.8319	0.3355		-199.526	0.00288403
-32.2107	0.3283		-295.121	0.000794328
-33.1131	0.321		-3451.44	7.4131e-06
-33.9625	0.3135		-53.9511	1.54882
-34.8337	0.3058		-57.9429	1
-35.5631	0.2979		-63.8263	0.549541
-36.141	0.2898		-72.6106	0.25704
-36.6438	0.2817		-87.0964	0.0977237
-37.2392	0.2741		-112.72	0.0288403
-37.7572	0.2668		-161.065	0.00691831
-38.1066	0.2591		-259.418	0.00169824
-38.6367	0.2505		-430.527	0.00047863
-39.4457	0.2419		-53.9511	0.977237
-40.0867	0.2339		-59.9791	0.57544
-40.5509	0.2259		-69.5024	0.213796
-41.0204	0.2177		-85.31	0.0812831
-41.8794	0.2092		-113.24	0.0234423
-42.7563	0.2007		-165.577	0.0057544
-43.7522	0.1921		-276.694	0.00128825
-44.7713	0.1836		-527.23	0.000229087
-46.1318	0.1752		-118.032	0.0436516
-47.7529	0.1668		-135.519	0.0194984
-49.7737	0.1582		-159.588	0.00891251
-52.2396	0.149		-193.642	0.00398107
-55.5904	0.1394		-246.037	0.00162181
-59.9791	0.1295		-333.426	0.000645654
-66.0693	0.1193		-722.77	0.000120226
-74.9894	0.1088		-393.55	0.00042658
-88.308	0.0983		-96.1612	0.0489779
-110.662	0.0876		-107.647	0.0295121
-151.356	0.0769		-122.462	0.018197
-225.944	0.0673		-141.579	0.0109648
-367.282	0.059		-165.959	0.00645654
-3990.25	0.0329		-197.242	0.00380189
-7.46449	0.3787		-238.232	0.00223872
-7.4817	0.3786		-291.743	0.00123027
-7.56833	0.3785		-361.41	0.000645654
-8.07235	0.3782		-454.988	0.000371535
-9.03649	0.378		-554.626	0.00025704
-10.1859	0.3776		-2582.26	9.33254e-06
-11.5345	0.3772		-92.045	0.0660693
-13.0317	0.3767		-101.859	0.0371535
-14.6893	0.3761		-113.763	0.0223872
-16.5196	0.3755		-128.529	0.0138038
-18.4502	0.3748		-147.231	0.00851138
-20.2302	0.374		-169.824	0.00549541
-21.8273	0.3731		-196.789	0.00354813
-23.4963	0.3722		-229.087	0.00229087
-25.293	0.3713		-268.534	0.00134896
-24.2103	0.3702		-316.228	0.000794328
-23.1206	0.3691		-377.572	0.000512861
-24.6037	0.368		-457.088	0.000316228
-25.8226	0.3667		-563.638	0.000194984
-27.227	0.3654		-3681.29	7.07946e-06
-28.2488	0.3641		-98.6279	0.0645654
-29.1743	0.3627		-110.662	0.0338844
-29.8538	0.3612		-126.474	0.018197
-30.4789	0.3597		-145.546	0.0107152
-31.2608	0.3581		-170.216	0.00616595
-31.6228	0.3564		-203.236	0.00338844
-31.9154	0.3547		-249.459	0.00177828
-32.2849	0.3529		-314.775	0.000933254
-32.6588	0.351		-408.319	0.000457088
-33.1131	0.3491		-508.159	0.000263027
-33.4965	0.3472		-2529.3	8.70964e-06
-33.7287	0.3451		-1	794.328
-34.1193	0.343
-34.435	0.3408
-34.5939	0.3385
-34.914	0.3362
-35.2371	0.3338
-35.4813	0.3313
-35.8096	0.3288
-36.141	0.3262
-36.4754	0.3236
-36.8978	0.3209
-37.2392	0.3181
-37.5837	0.3153
-37.9315	0.3125
-38.2825	0.3096
-38.5478	0.3066
-38.9045	0.3035
-39.1742	0.3004
-39.4457	0.2971
-39.9025	0.2937
-40.1791	0.2902
-40.3645	0.2865
-40.6443	0.2828
-40.9261	0.2789
-41.2098	0.275
-41.4954	0.2709
-41.783	0.2668
-42.0727	0.2626
-42.462	0.2583
-42.7563	0.254
-42.9536	0.2496
-43.0527	0.2452
-43.3511	0.2408
-43.7522	0.2362
-44.157	0.2316
-44.5656	0.227
-44.8745	0.2222
-45.2898	0.2174
-45.7088	0.2126
-46.1318	0.2076
-46.5586	0.2026
-47.0977	0.1975
-47.6431	0.1923
-48.4172	0.187
-49.204	0.1817
-50.2343	0.1762
-51.2861	0.1707
-52.4807	0.1651
-53.9511	0.1594
-55.7186	0.1538
-57.544	0.148
-59.8412	0.1422
-62.5173	0.1363
-65.7658	0.1304
-69.6627	0.1245
-74.4732	0.1185
-80.3526	0.1125
-87.7001	0.1064
-97.499	0.1004
-110.408	0.0945
-127.057	0.0888
-149.624	0.0832
-179.473	0.0776
-218.776	0.0718
-271.019	0.0663
-340.408	0.0614
-434.51	0.057
-566.239	0.0532
-421.697	0.0575
-4.14	0.3719
-11.995	0.3684
-22.08	0.3641
-26.6073	0.3593
-28.9068	0.3541
-30.0608	0.3486
-30.8319	0.3429
-31.6228	0.3369
-32.3594	0.3306
-32.8852	0.324
-33.4965	0.3171
-34.1193	0.31
-34.7536	0.3028
-35.3997	0.2954
-36.0579	0.2878
-36.7282	0.2799
-37.325	0.2715
-38.0189	0.2628
-38.6367	0.2538
-39.355	0.2447
-39.9945	0.2354
-40.6443	0.2261
-41.4	0.2168
-42.1697	0.2073
-43.1519	0.1977
-44.157	0.1879
-45.3942	0.1781
-47.0977	0.168
-49.204	0.1578
-51.88	0.1475
-55.335	0.1371
-60.256	0.1268
-66.9885	0.1164
-76.7361	0.1059
-91.622	0.0956
-114.815	0.0853
-148.936	0.0756
-199.526	0.0673
-295.121	0.0603
-3451.44	0.0345
-1.52757	0.3554
-6.39735	0.353
-13.9316	0.3502
-19.9526	0.3472
-19.0985	0.3437
-20.0909	0.3397
-25.8226	0.3353
-29.9226	0.3306
-33.037	0.3255
-34.3558	0.3201
-35.6451	0.3145
-37.0681	0.3084
-37.7572	0.302
-38.4592	0.2952
-39.0841	0.288
-39.8107	0.2804
-40.3645	0.2723
-40.9261	0.2637
-41.5911	0.2547
-42.0727	0.2453
-42.5598	0.2355
-43.2514	0.2256
-43.9542	0.2155
-44.5656	0.2048
-45.4988	0.1936
-47.0977	0.1821
-48.9779	0.1708
-51.1682	0.1597
-53.9511	0.1484
-57.9429	0.1368
-63.8263	0.1251
-72.6106	0.1131
-87.0964	0.1007
-112.72	0.0882
-161.065	0.0764
-259.418	0.0654
-430.527	0.0561
-6.25173	0.3537
-12.5893	0.3509
-17.4582	0.3476
-20.4174	0.3439
-22.9615	0.3396
-24.5471	0.3349
-25.3513	0.33
-26.7301	0.3249
-28.2488	0.3196
-29.3765	0.3141
-30.4089	0.3082
-31.3329	0.3018
-32.2849	0.2948
-33.1131	0.2874
-33.8844	0.2796
-34.6737	0.2713
-35.3997	0.2625
-36.141	0.2533
-36.8978	0.2435
-37.5837	0.2334
-38.2825	0.2233
-39.1742	0.2129
-40.0867	0.2021
-41.2098	0.1907
-42.7563	0.1792
-44.5656	0.1678
-46.8813	0.1557
-49.8884	0.1469
-53.9511	0.1382
-59.9791	0.1247
-69.5024	0.1112
-85.31	0.0985
-113.24	0.0857
-165.577	0.0738
-276.694	0.0629
-527.23	0.0541
-2.52348	0.3485
-2.56448	0.3485
-2.41546	0.3485
-2.33346	0.3484
-2.50035	0.3483
-2.71019	0.3482
-2.95801	0.3479
-3.34965	0.3476
-4.3451	0.347
-5.79429	0.3462
-6.77642	0.3452
-7.29458	0.3443
-8.33681	0.3435
-9.46237	0.3425
-10.4472	0.3415
-11.5345	0.3405
-12.8529	0.3394
-14.1254	0.3383
-16.9044	0.3371
-20.6063	0.3359
-23.4963	0.3347
-26.0016	0.3334
-27.7971	0.3321
-29.3765	0.3307
-29.7852	0.3293
-27.2898	0.3279
-27.3527	0.3264
-27.6694	0.3249
-27.8612	0.3233
-30.4089	0.3217
-31.4051	0.32
-32.2849	0.3182
-33.1131	0.3163
-33.6512	0.3144
-34.1979	0.3123
-34.914	0.3103
-35.5631	0.3081
-36.141	0.3059
-36.8978	0.3037
-37.5837	0.3014
-38.1944	0.2991
-38.815	0.2967
-39.4457	0.2942
-40.0867	0.2916
-40.6443	0.289
-41.2098	0.2863
-41.5911	0.2835
-41.8794	0.2807
-42.1697	0.2777
-42.5598	0.2746
-42.9536	0.2713
-43.3511	0.268
-43.5512	0.2645
-43.8531	0.2609
-44.157	0.2572
-44.4631	0.2534
-44.7713	0.2496
-45.0817	0.2457
-45.2898	0.2419
-45.6037	0.2379
-46.0257	0.234
-46.3447	0.23
-46.6659	0.2261
-46.9894	0.2223
-47.4242	0.2185
-47.863	0.2148
-48.1948	0.211
-48.6407	0.2071
-49.0908	0.2031
-49.545	0.199
-50.1187	0.1948
-50.6991	0.1906
-51.4044	0.1863
-52.1195	0.1818
-52.9663	0.1772
-53.827	0.1724
-54.8277	0.1674
-56.1048	0.1621
-57.4116	0.1568
-58.8844	0.1515
-60.6736	0.1461
-62.8058	0.1408
-65.013	0.1355
-67.4528	0.1302
-70.3072	0.125
-73.9605	0.1199
-78.1628	0.1147
-83.1764	0.1095
-89.1251	0.1044
-96.1612	0.0991
-105.196	0.0938
-118.032	0.0882
-135.519	0.0825
-159.588	0.077
-193.642	0.0717
-246.037	0.0669
-333.426	0.0626
-722.77	0.0547
-393.55	0.0608
-5.78096	0.361
-5.83445	0.3609
-5.95662	0.3608
-6.10942	0.3605
-6.28058	0.3602
-6.53131	0.3597
-7.03072	0.3592
-8.41395	0.3585
-10.7399	0.3579
-13.9637	0.3572
-16.6725	0.3564
-17.7011	0.3556
-18.8799	0.3548
-20.4644	0.3538
-21.3304	0.3529
-22.5424	0.3518
-23.8781	0.3507
-24.8886	0.3496
-26.1216	0.3484
-27.1644	0.3471
-28.2488	0.3459
-29.5121	0.3445
-30.761	0.3432
-31.9154	0.3417
-32.8852	0.3403
-33.6512	0.3388
-34.5144	0.3372
-34.8337	0.3356
-34.1979	0.334
-34.435	0.3322
-35.7273	0.3305
-36.3915	0.3286
-36.2243	0.3267
-36.3078	0.3246
-36.5595	0.3225
-36.8129	0.3203
-37.4111	0.318
-37.6704	0.3156
-37.8443	0.3132
-38.1066	0.3107
-38.4592	0.3081
-38.7258	0.3055
-38.9942	0.3028
-39.355	0.3001
-39.7192	0.2973
-40.0867	0.2943
-40.3645	0.2914
-40.6443	0.2883
-41.0204	0.2851
-41.3048	0.2819
-41.5911	0.2785
-41.8794	0.2751
-42.0727	0.2715
-42.2669	0.2678
-42.462	0.2639
-42.7563	0.2599
-43.0527	0.2558
-43.3511	0.2515
-43.6516	0.2472
-43.8531	0.2427
-44.0555	0.2383
-44.2588	0.2338
-44.5656	0.2293
-44.7713	0.2248
-45.0817	0.2202
-45.3942	0.2157
-45.6037	0.2111
-45.9198	0.2065
-46.4515	0.202
-46.8813	0.1974
-47.3151	0.1929
-47.9733	0.1882
-48.4172	0.1834
-49.0908	0.1785
-49.8884	0.1736
-50.8159	0.1685
-51.88	0.1634
-53.0884	0.1582
-54.5758	0.1529
-56.1048	0.1476
-57.9429	0.1421
-60.1174	0.1365
-62.5173	0.1308
-65.6145	0.125
-69.3426	0.1191
-73.7904	0.1131
-79.4328	0.107
-86.896	0.1009
-96.1612	0.0952
-107.647	0.0899
-122.462	0.0847
-141.579	0.0795
-165.959	0.0745
-197.242	0.0698
-238.232	0.0654
-291.743	0.0615
-361.41	0.0582
-454.988	0.0553
-554.626	0.0527
-2582.26	0.0394
-4.68813	0.3843
-4.66659	0.3842
-4.64515	0.384
-4.62381	0.3837
-4.94311	0.3834
-6.08135	0.3829
-8.33681	0.3823
-11.6145	0.3817
-15.0661	0.381
-17.9473	0.3802
-19.8153	0.3793
-21.0863	0.3783
-22.5944	0.3773
-23.2809	0.3763
-23.8232	0.3751
-24.9459	0.3739
-25.6448	0.3727
-26.3027	0.3714
-27.2898	0.3701
-28.0543	0.3687
-28.7078	0.3673
-29.5801	0.3659
-30.3389	0.3644
-30.8319	0.3629
-31.2608	0.3613
-31.7687	0.3596
-32.1366	0.3579
-32.434	0.3561
-32.5837	0.3542
-32.8095	0.3522
-33.1131	0.3501
-33.266	0.3478
-33.3426	0.3455
-33.266	0.343
-33.3426	0.3405
-33.8065	0.338
-34.0408	0.3354
-34.3558	0.3327
-34.5939	0.3299
-34.914	0.327
-35.2371	0.3241
-35.5631	0.3211
-35.8096	0.318
-36.141	0.3148
-36.3915	0.3114
-36.6438	0.308
-36.9828	0.3045
-36.9828	0.3008
-37.1535	0.297
-37.5837	0.293
-37.8443	0.2889
-38.1944	0.2845
-38.4592	0.2801
-38.7258	0.2756
-38.9942	0.271
-39.355	0.2664
-39.6278	0.2618
-39.9025	0.2572
-40.1791	0.2527
-40.5509	0.2482
-40.9261	0.2436
-41.3048	0.2391
-41.6869	0.2347
-42.1697	0.2303
-42.5598	0.2258
-43.0527	0.2213
-43.5512	0.2166
-44.0555	0.2118
-44.6684	0.207
-45.3942	0.2021
-46.1318	0.197
-46.8813	0.1919
-47.7529	0.1866
-48.7528	0.1812
-49.7737	0.1756
-51.0505	0.1698
-52.4807	0.1639
-54.2001	0.1578
-56.1048	0.1516
-58.479	0.1453
-61.235	0.139
-64.4169	0.1328
-67.9204	0.1267
-72.277	0.1206
-77.6247	0.1145
-84.1395	0.1085
-92.045	0.1026
-101.859	0.0969
-113.763	0.0914
-128.529	0.0861
-147.231	0.0808
-169.824	0.0756
-196.789	0.0706
-229.087	0.0661
-268.534	0.0621
-316.228	0.0589
-377.572	0.056
-457.088	0.0533
-563.638	0.0509
-3681.29	0.0349
-3.3266	0.3714
-3.25087	0.3713
-3.1842	0.3712
-3.36512	0.3709
-3.53997	0.3705
-3.78443	0.3701
-4.2658	0.3695
-4.98884	0.3689
-6.74528	0.3682
-9.28966	0.3674
-11.722	0.3665
-14.2233	0.3655
-16.4059	0.3644
-17.6198	0.3633
-19.4089	0.3621
-21.5278	0.3608
-22.5944	0.3594
-23.7684	0.3579
-25.0035	0.3564
-26.0615	0.3548
-25.704	0.3532
-26.0016	0.3515
-27.6058	0.3497
-28.5102	0.3479
-29.1743	0.3461
-29.5801	0.3441
-29.9916	0.3422
-30.5492	0.3401
-31.1172	0.3381
-31.55	0.3359
-31.7687	0.3337
-31.989	0.3314
-32.3594	0.329
-32.7341	0.3265
-32.434	0.3239
-32.5837	0.3213
-33.266	0.3185
-33.6512	0.3156
-33.8844	0.3127
-34.1979	0.3096
-34.5144	0.3065
-34.7536	0.3033
-34.8337	0.3
-35.0752	0.2965
-35.4813	0.293
-35.8096	0.2894
-36.0579	0.2857
-36.3915	0.282
-36.6438	0.2781
-36.8978	0.2742
-37.1535	0.2702
-37.325	0.2662
-37.4973	0.2622
-37.7572	0.2581
-38.1066	0.254
-38.3707	0.2498
-38.6367	0.2456
-38.9942	0.2413
-39.2645	0.2369
-39.6278	0.2326
-39.9945	0.2282
-40.3645	0.2237
-40.738	0.2193
-41.115	0.2149
-41.4	0.2105
-41.9759	0.206
-42.462	0.2016
-43.0527	0.1972
-43.6516	0.1927
-44.2588	0.1882
-45.0817	0.1837
-45.8142	0.1791
-46.6659	0.1744
-47.6431	0.1696
-48.6407	0.1649
-49.7737	0.1603
-51.0505	0.1557
-52.4807	0.1511
-53.9511	0.1465
-55.7186	0.1418
-57.6766	0.1371
-59.5662	0.1324
-61.9441	0.1277
-64.7143	0.1229
-68.2339	0.1181
-72.277	0.1132
-76.913	0.1084
-82.6038	0.1035
-89.5365	0.0985
-98.6279	0.0935
-110.662	0.0883
-126.474	0.0831
-145.546	0.078
-170.216	0.0729
-203.236	0.068
-249.459	0.0634
-314.775	0.0592
-408.319	0.0554
-508.159	0.0522
-2529.3	0.0373
-1.14815e+06	0.0054
-37153.5	0.0166
-6760.83	0.033
-1698.24	0.0488
-1.14815e+06	0.0054
-37153.5	0.0166
-6760.83	0.033
-1698.24	0.0488
-1.14815e+06	0.0054
-37153.5	0.0166
-6760.83	0.033
-1698.24	0.0489
-1.14815e+06	0.0054
-37153.5	0.0166
-6760.83	0.033
-1698.24	0.0489
-1.14815e+06	0.0054
-37153.5	0.0166
-6760.83	0.033
-1698.24	0.0489
-1.14815e+06	0.0054
-37153.5	0.0166
-6760.83	0.033
-1698.24	0.0489
-870964	0.009
-151356	0.014
-20417.4	0.028
-9772.37	0.033

[truncated: 20 more sheets: Test4, Test5, Test6, Test7, Test8, Test9, Test10, Test11, Test12, Test13, Test14, Test15, Test16, Test17, Test18, Test19, Test20, Test21, Test22, Test23]
