# Supplementary material for: Full prediction of unsaturated hydraulic conductivity – comparison of four different capillary bundle models
Source: Copernicus journal article supplement (doi:10.5194/hess-2023-134), 2023-06-16
Supplement: Supplementary file 1 [file hess-2023-134-supplement.zip]

1    **Supplemental Material S1**

2    **Title: Full prediction of unsaturated hydraulic conductivity - comparison of four different**  
3    **capillary bundle models**

4    Andre Peters<sup>1</sup>, Sascha C. Iden<sup>1</sup>, and Wolfgang Durner<sup>1</sup>

5    <sup>1</sup>Division of Soil Science and Soil Physics, Institute of Geoecology, Technische Universität  
6    Braunschweig, Germany

7  
8    Corresponding author: E-mail: a.peters@tu-braunschweig.de, phone: +49 531 5633

9

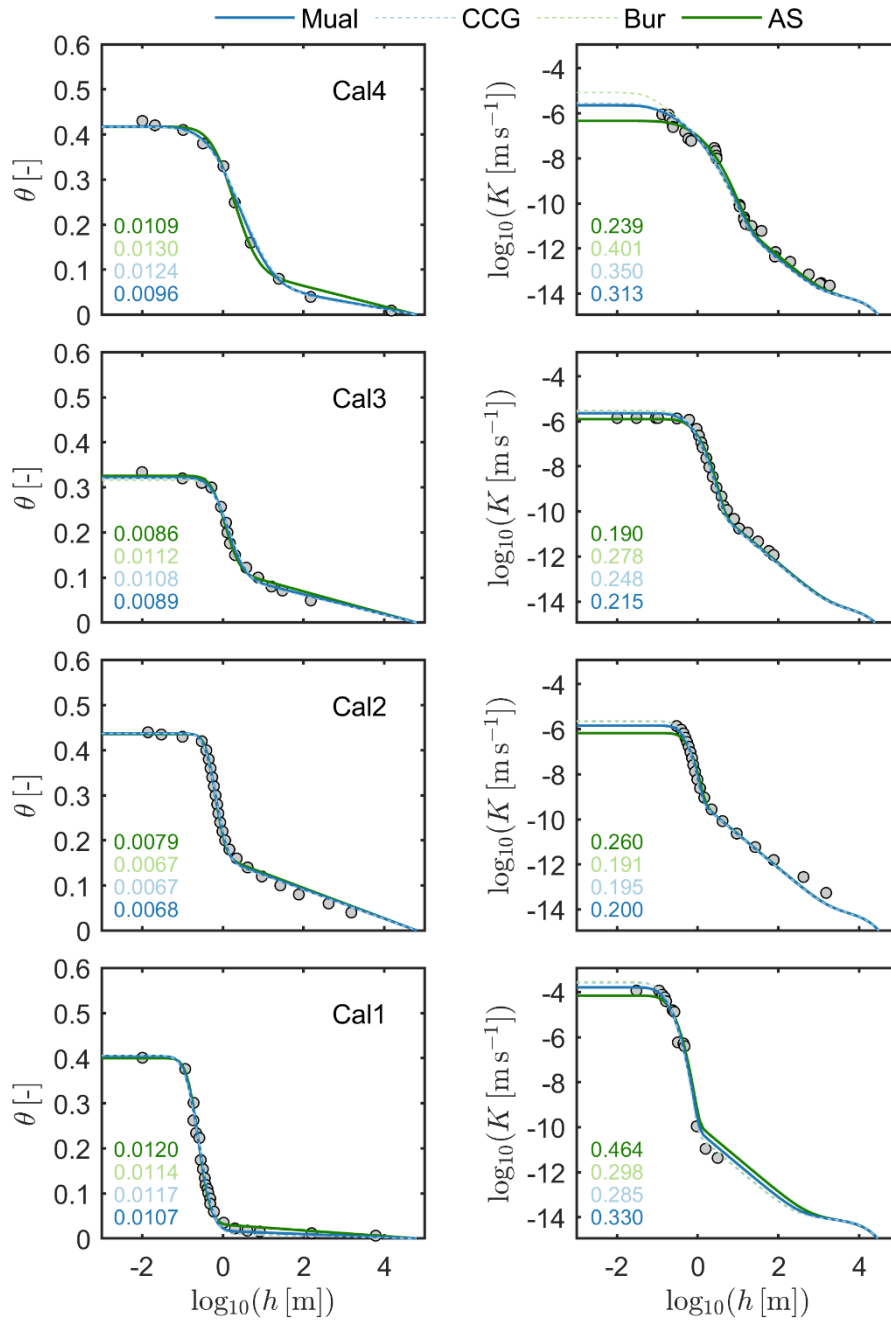

11

12 Fig. S1: Calibration data sets and the fitted water retention and conductivity functions used to  
 13 calibrate the saturated tortuosity coefficient  $\tau_s$ . Shown are data set 1 to 4 of the 12 calibration data  
 14 sets and the **Kos-PDI** retention model combined with the 4 capillary bundle models. Parameter  $\tau_s$   
 15 and the retention parameters were allowed to vary. Numbers in the subplots indicate RMSE $_{\theta}$  and  
 16 RMSE $_{\log k}$  values for the various model combinations.

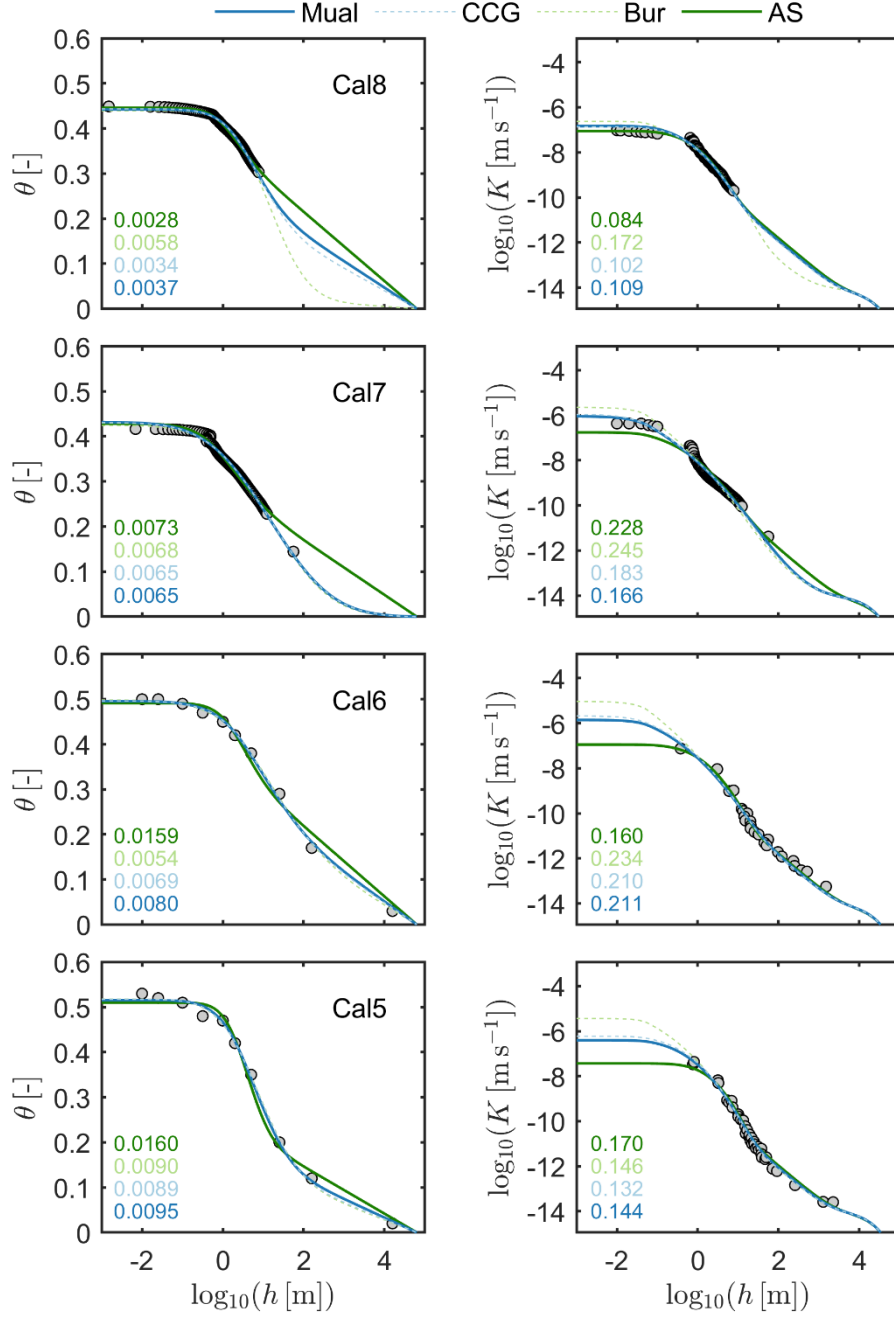

17

18 Fig. S2: Calibration data sets and the fitted water retention and conductivity functions used to  
 19 calibrate the saturated tortuosity coefficient  $\tau_s$ . Shown are data set 5 to 8 of the 12 calibration data  
 20 sets and the **Kos-PDI** retention model combined with the 4 capillary bundle models. Parameter  $\tau_s$   
 21 and the retention parameters were allowed to vary. Numbers in the subplots indicate RMSE<sub>θ</sub> and  
 22 RMSE<sub>logK</sub> values for the various model combinations.

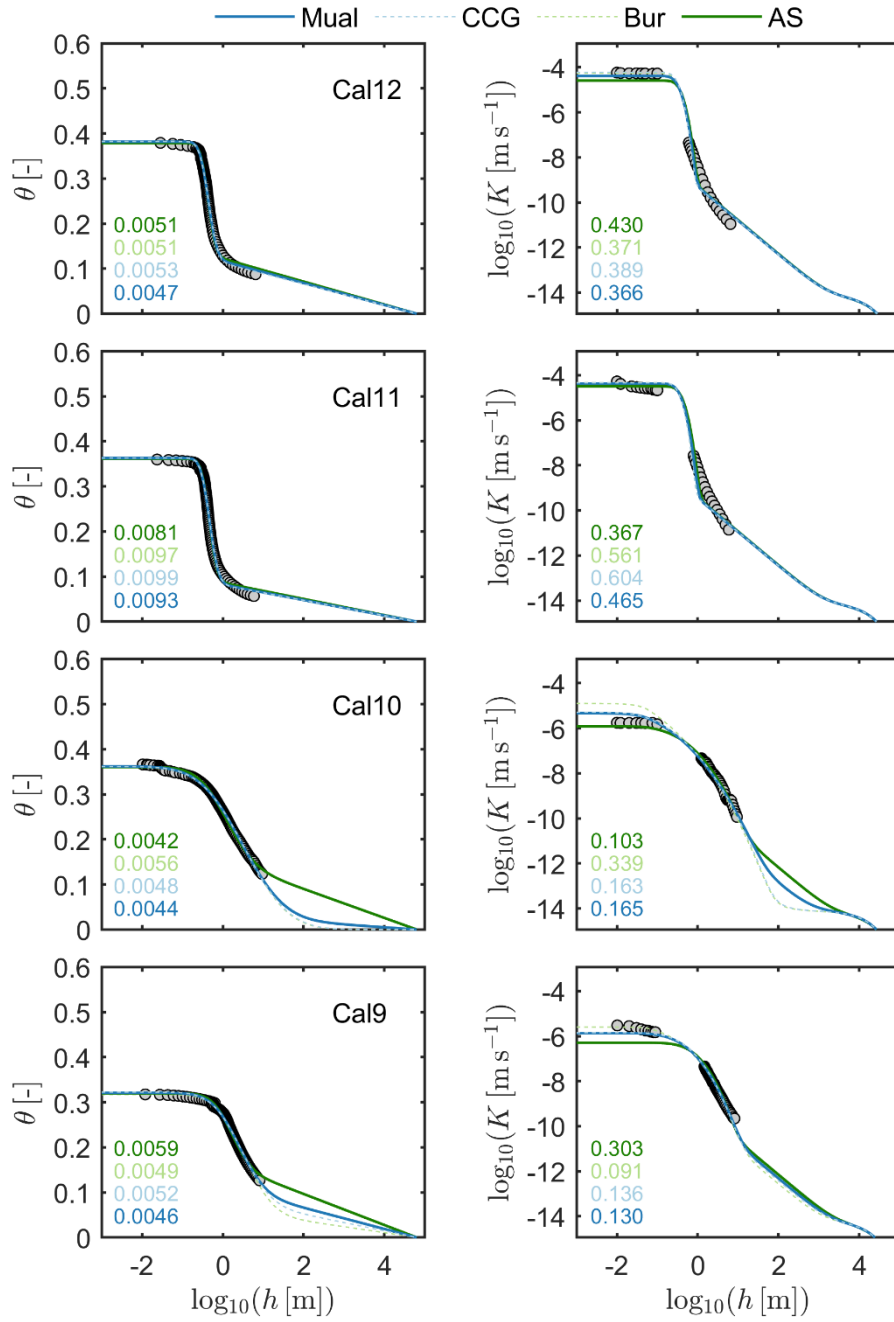

Fig. S3: Calibration data sets and the fitted water retention and conductivity functions used to calibrate the saturated tortuosity coefficient  $\tau_s$ . Shown are data set 9 to 12 of the 12 calibration data sets and the **Kos-PDI** retention model combined with the 4 capillary bundle models. Parameter  $\tau_s$  and the retention parameters were allowed to vary. Numbers in the subplots indicate RMSE $_{\theta}$  and RMSE $_{\log K}$  values for the various model combinations.

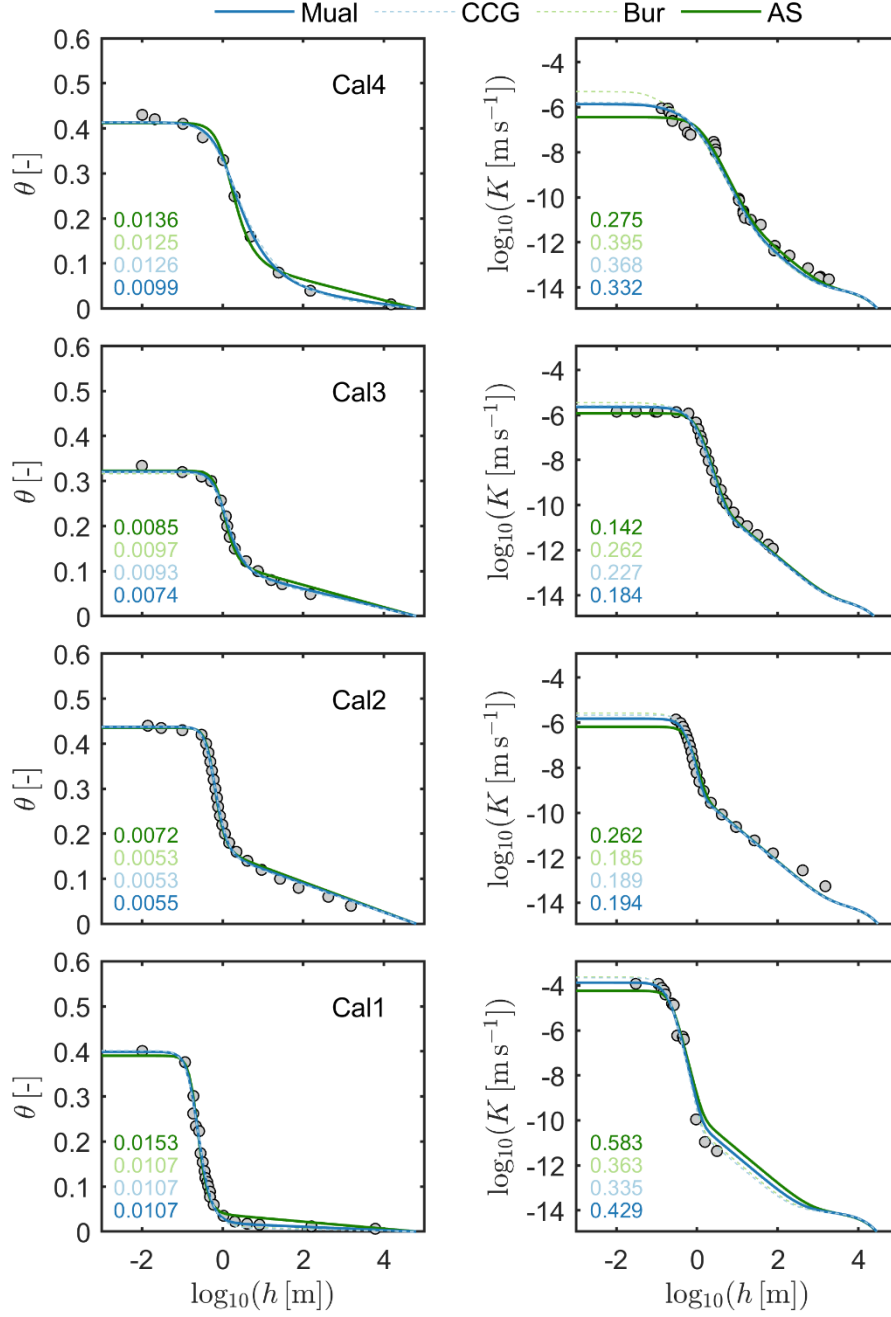

Fig. S4: Calibration data sets and the fitted water retention and conductivity functions used to calibrate the saturated tortuosity coefficient  $\tau_s$ . Shown are data set 1 to 4 of the 12 calibration data sets and the **vGc-PDI** retention model combined with the 4 capillary bundle models. Parameter  $\tau_s$  and the retention parameters were allowed to vary. Numbers in the subplots indicate RMSE $_{\theta}$  and RMSE $_{\log k}$  values for the various model combinations.

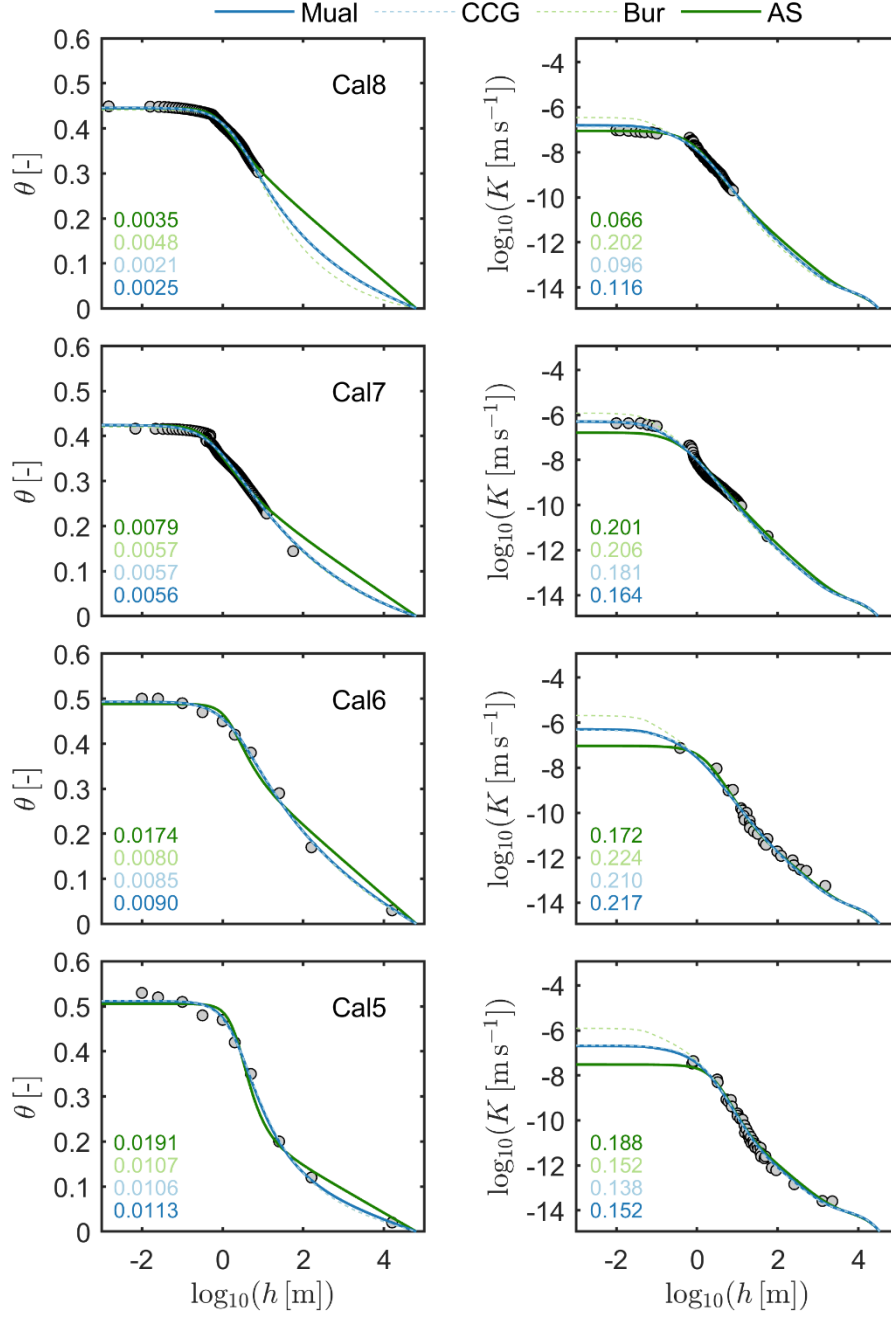

38

39 Fig. S5: Calibration data sets and the fitted water retention and conductivity functions used to  
 40 calibrate the saturated tortuosity coefficient  $\tau_s$ . Shown are data set 5 to 8 of the 12 calibration data  
 41 sets and the **vGc-PDI** retention model combined with the 4 capillary bundle models. Parameter  $\tau_s$   
 42 and the retention parameters were allowed to vary. Numbers in the subplots indicate  $RMSE_\theta$  and  
 43  $RMSE_{\log k}$  values for the various model combinations.

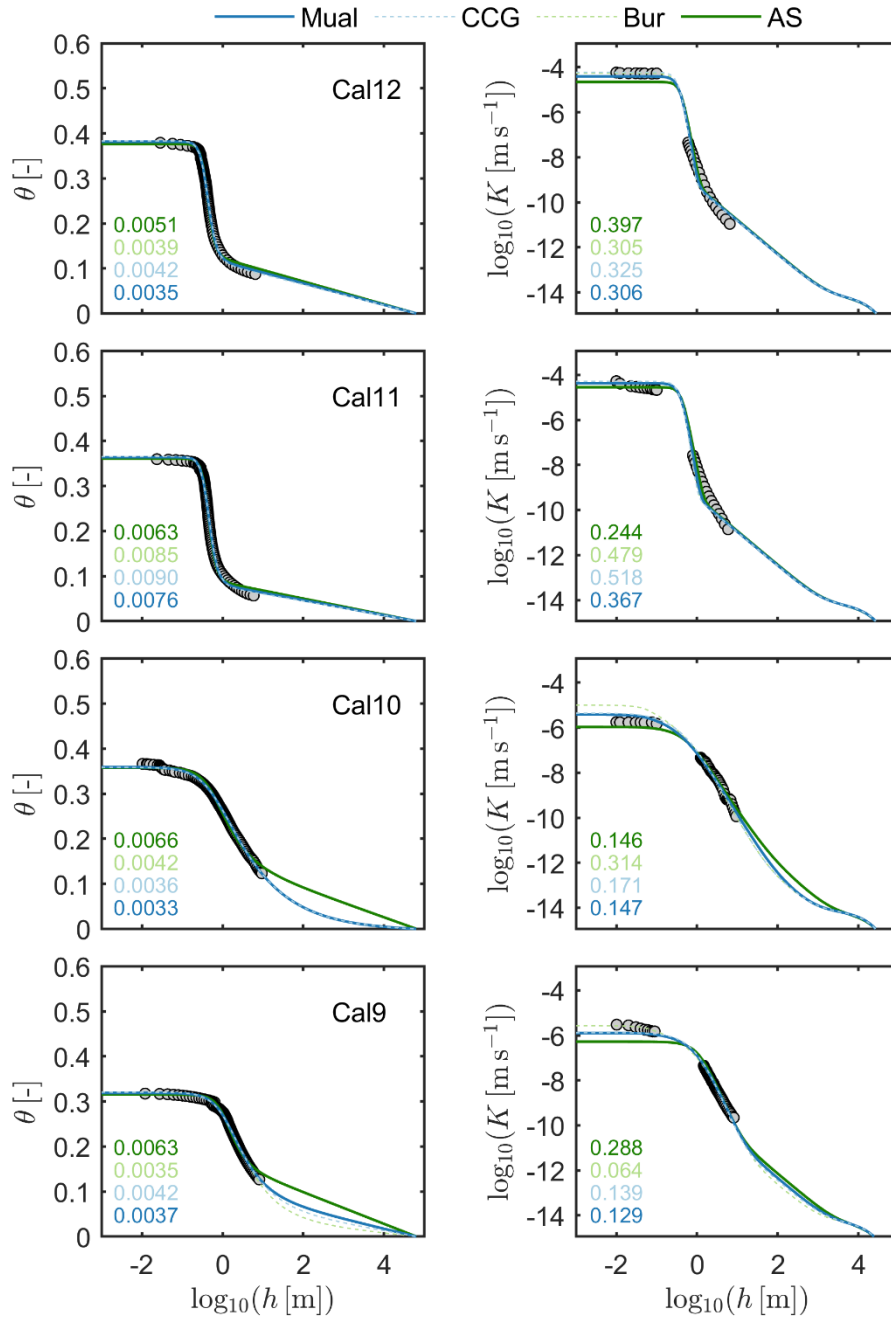

Fig. S6 Calibration data sets and the fitted water retention and conductivity functions used to calibrate the saturated tortuosity coefficient  $\tau_s$ . Shown are data set 9 to 12 of the 12 calibration data sets and the **vGc-PDI** retention model combined with the 4 capillary bundle models. Parameter  $\tau_s$  and the retention parameters were allowed to vary. Numbers in the subplots indicate RMSE<sub>θ</sub> and RMSE<sub>logK</sub> values for the various model combinations.

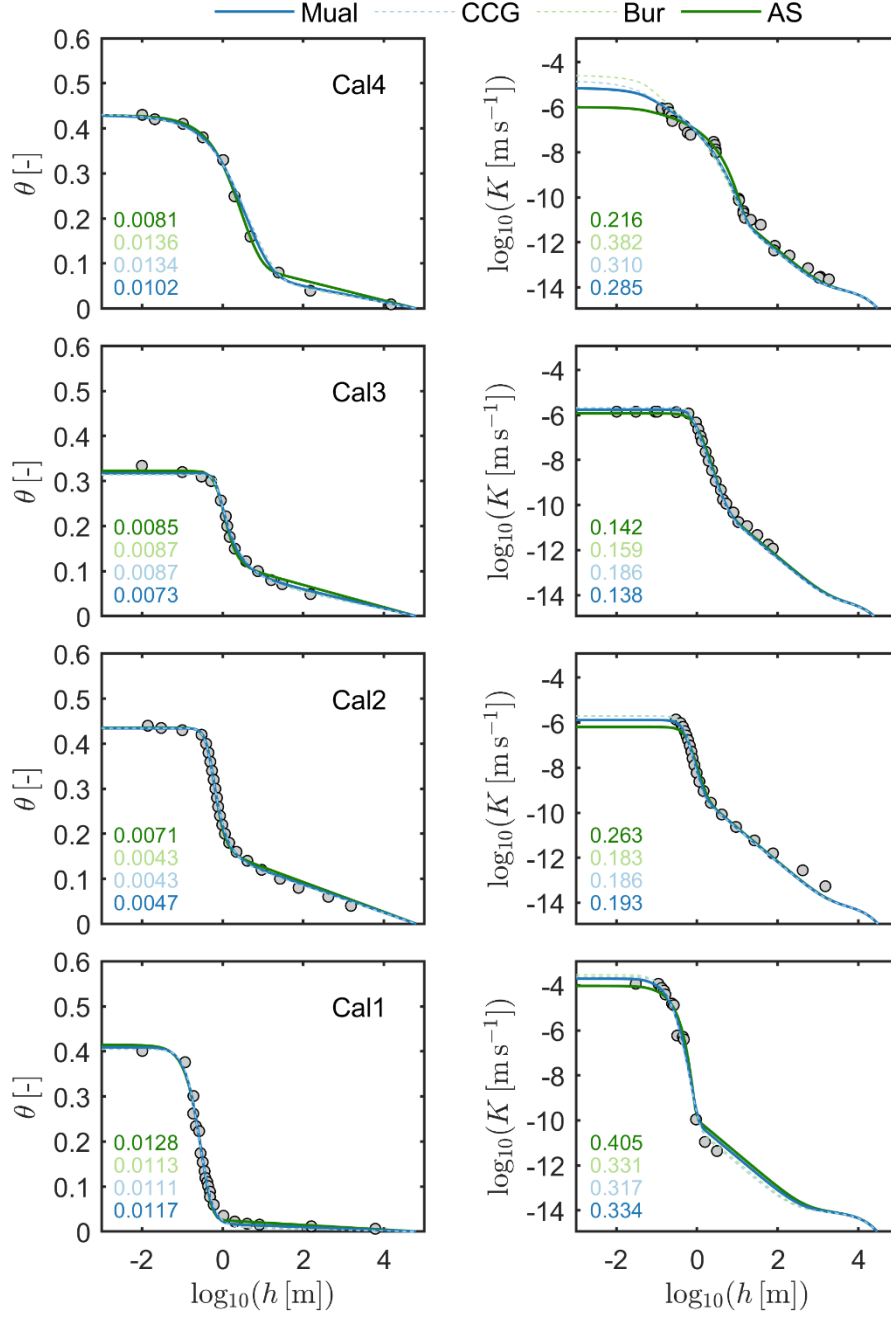

Fig. S7: Calibration data sets and the fitted water retention and conductivity functions used to calibrate the saturated tortuosity coefficient  $\tau_s$ . Shown are data set 1 to 4 of the 12 calibration data sets and the **vGmn-PDI** retention model combined with the 4 capillary bundle models. Parameter  $\tau_s$  and the retention parameters were allowed to vary. Numbers in the subplots indicate  $RMSE_\theta$  and  $RMSE_{\log k}$  values for the various model combinations.



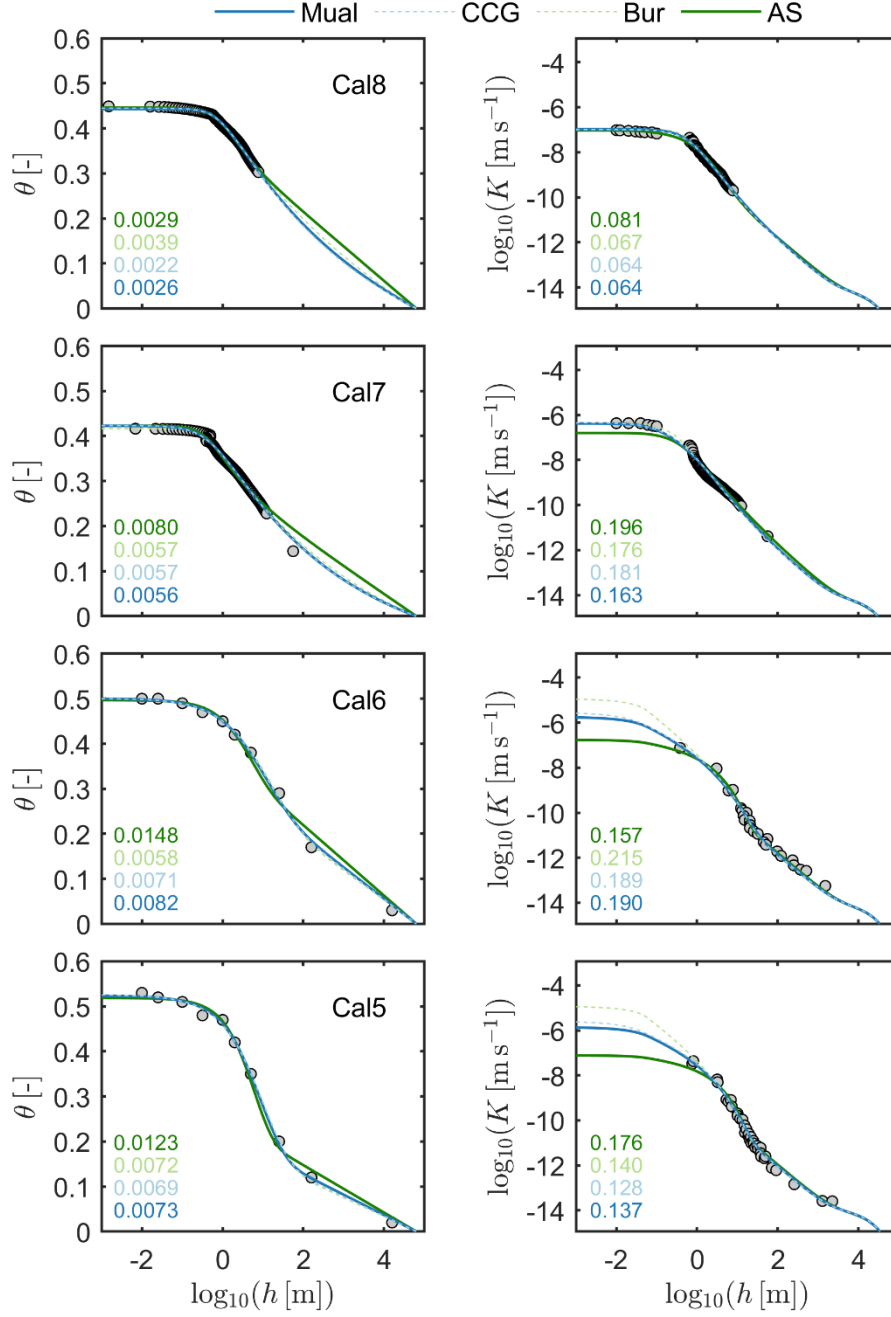

58

59 Fig. S8: Calibration data sets and the fitted water retention and conductivity functions used to  
60 calibrate the saturated tortuosity coefficient  $\tau_s$ . Shown are data set 5 to 8 of the 12 calibration data  
61 sets and the **vGmn-PDI** retention model combined with the 4 capillary bundle models. Parameter  $\tau_s$   
62 and the retention parameters were allowed to vary. Numbers in the subplots indicate RMSE<sub>θ</sub> and  
63 RMSE<sub>logK</sub> values for the various model combinations.

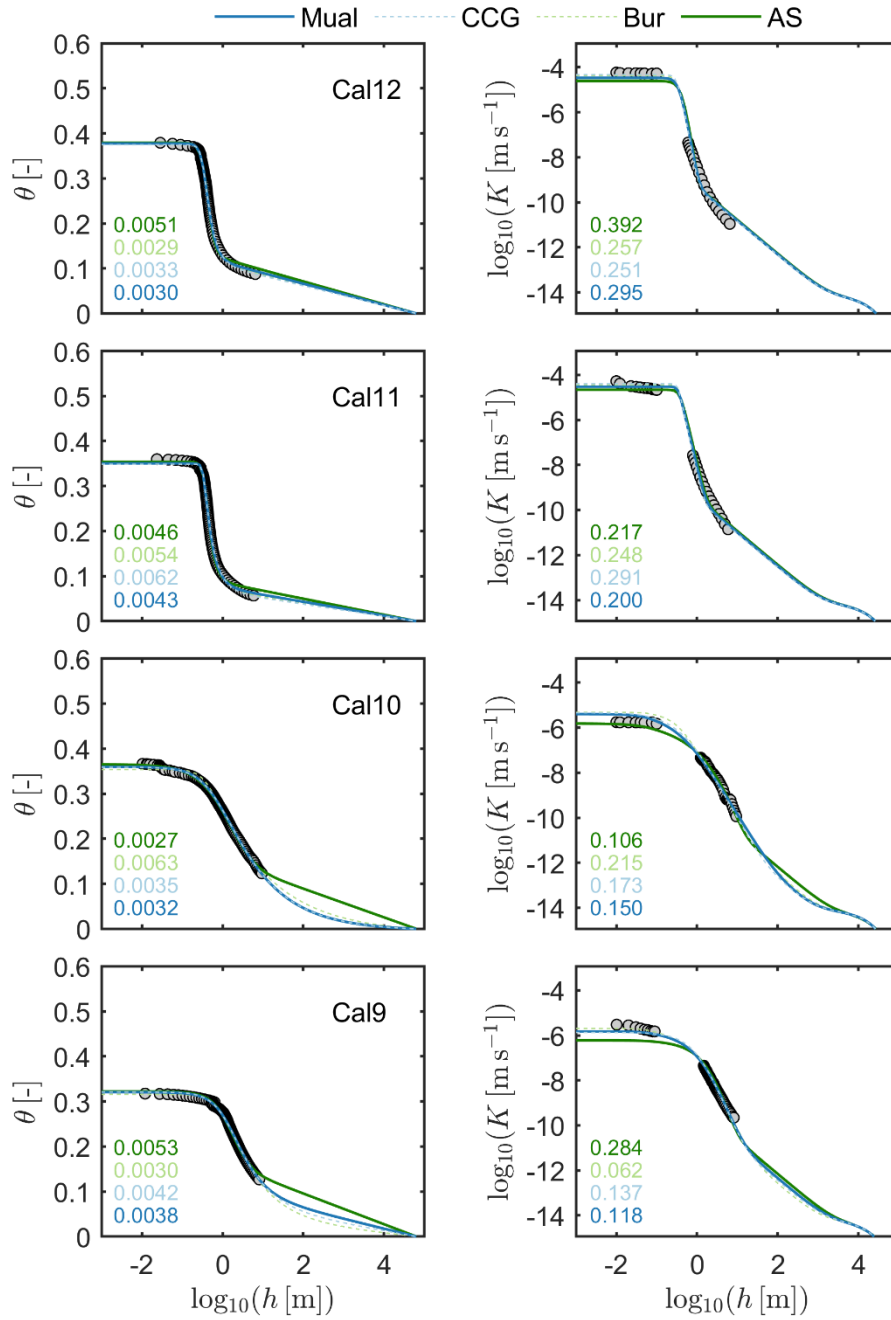

Fig. S9: Calibration data sets and the fitted water retention and conductivity functions used to calibrate the saturated tortuosity coefficient  $\tau_s$ . Shown are data set 9 to 12 of the 12 calibration data sets and the **vGmn-PDI** retention model combined with the 4 capillary bundle models. Parameter  $\tau_s$  and the retention parameters were allowed to vary. Numbers in the subplots indicate  $RMSE_{\theta}$  and  $RMSE_{\log K}$  values for the various model combinations.

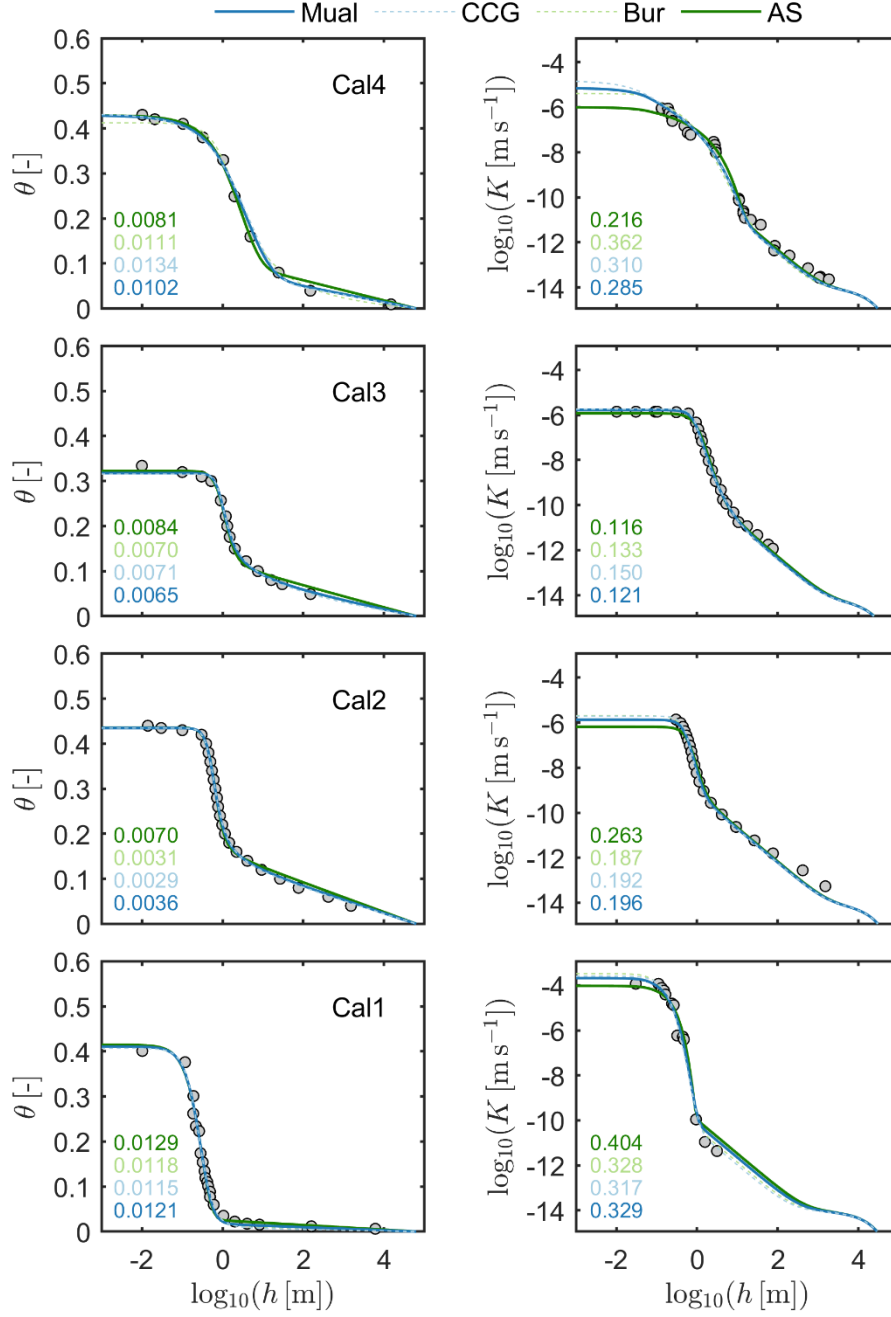

Fig. S10: Calibration data sets and the fitted water retention and conductivity functions used to calibrate the saturated tortuosity coefficient  $\tau_s$ . Shown are data set 1 to 4 of the 12 calibration data sets and the **FX-PDI** retention model combined with the 4 capillary bundle models. Parameter  $\tau_s$  and the retention parameters were allowed to vary. Numbers in the subplots indicate RMSE $_{\theta}$  and RMSE $_{\log k}$  values for the various model combinations.

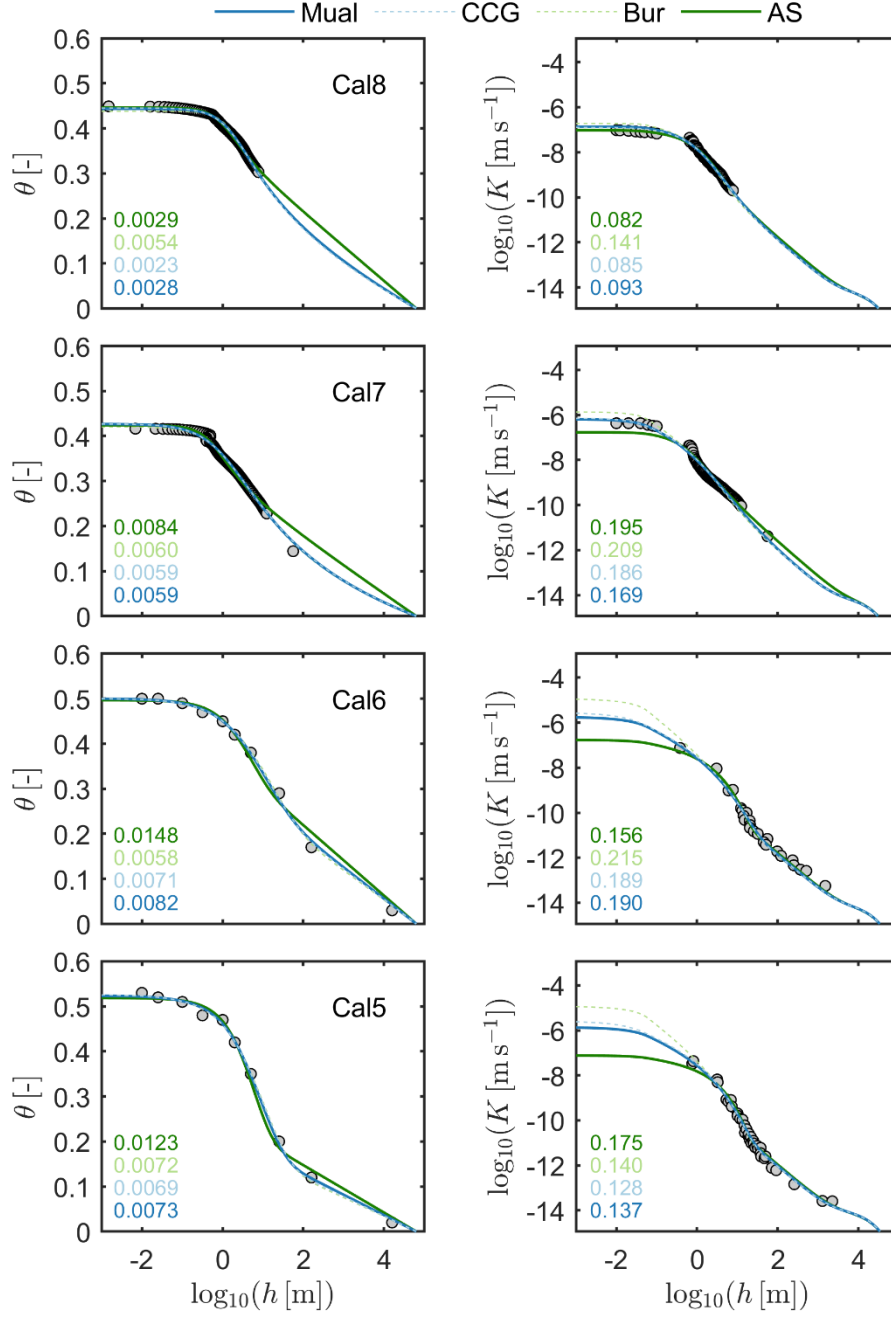

78

79 Fig. S11: Calibration data sets and the fitted water retention and conductivity functions used to  
80 calibrate the saturated tortuosity coefficient  $\tau_s$ . Shown are data set 5 to 8 of the 12 calibration data  
81 sets and the **FX-PDI** retention model combined with the 4 capillary bundle models. Parameter  $\tau_s$  and  
82 the retention parameters were allowed to vary. Numbers in the subplots indicate RMSE<sub>θ</sub> and  
83 RMSE<sub>logK</sub> values for the various model combinations.

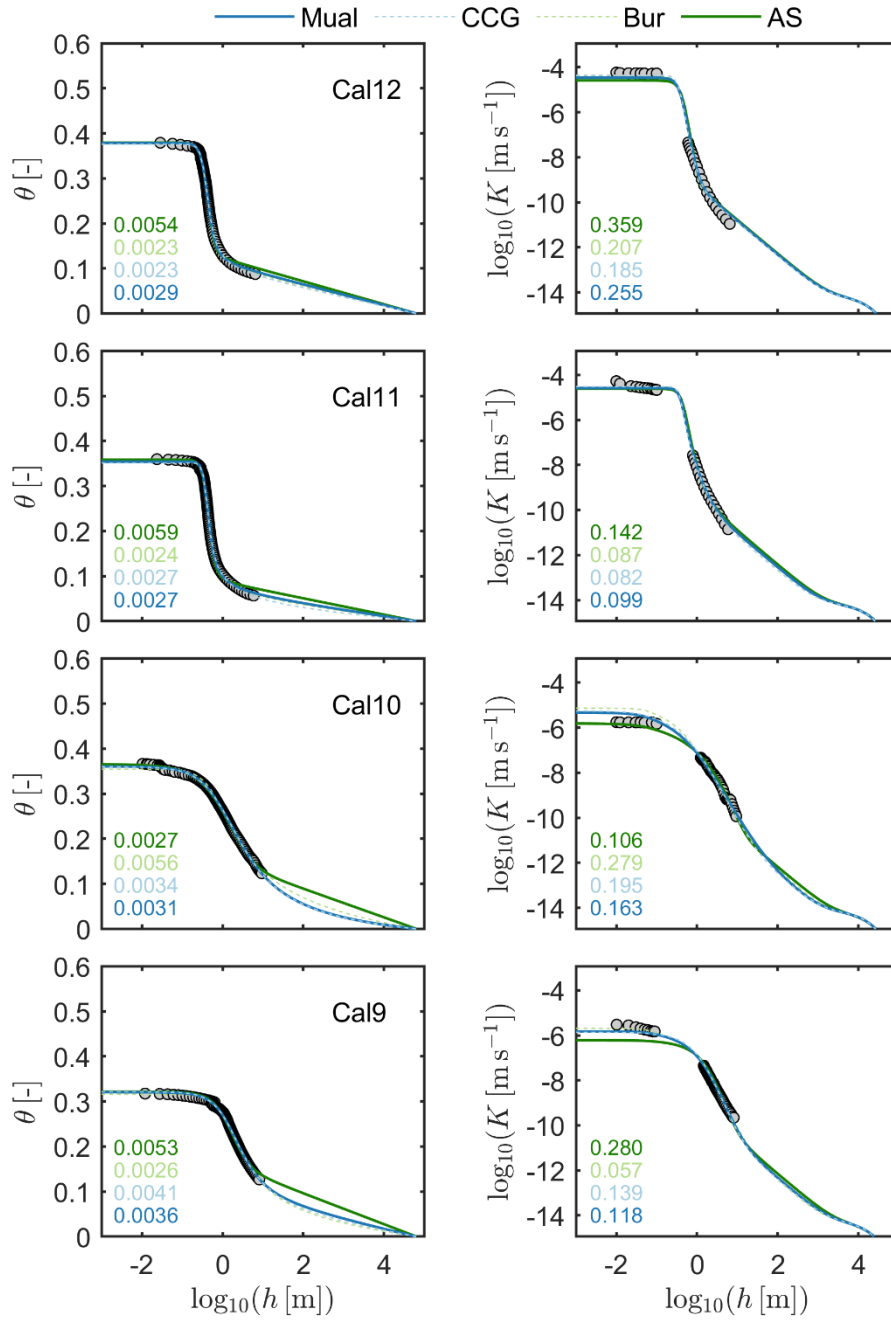

Fig. S12: Calibration data sets and the fitted water retention and conductivity functions used to calibrate the saturated tortuosity coefficient  $\tau_s$ . Shown are data set 9 to 12 of the 12 calibration data sets and the **FX-PDI** retention model combined with the 4 capillary bundle models. Parameter  $\tau_s$  and the retention parameters were allowed to vary. Numbers in the subplots indicate RMSE $_{\theta}$  and RMSE $_{\log K}$  values for the various model combinations.

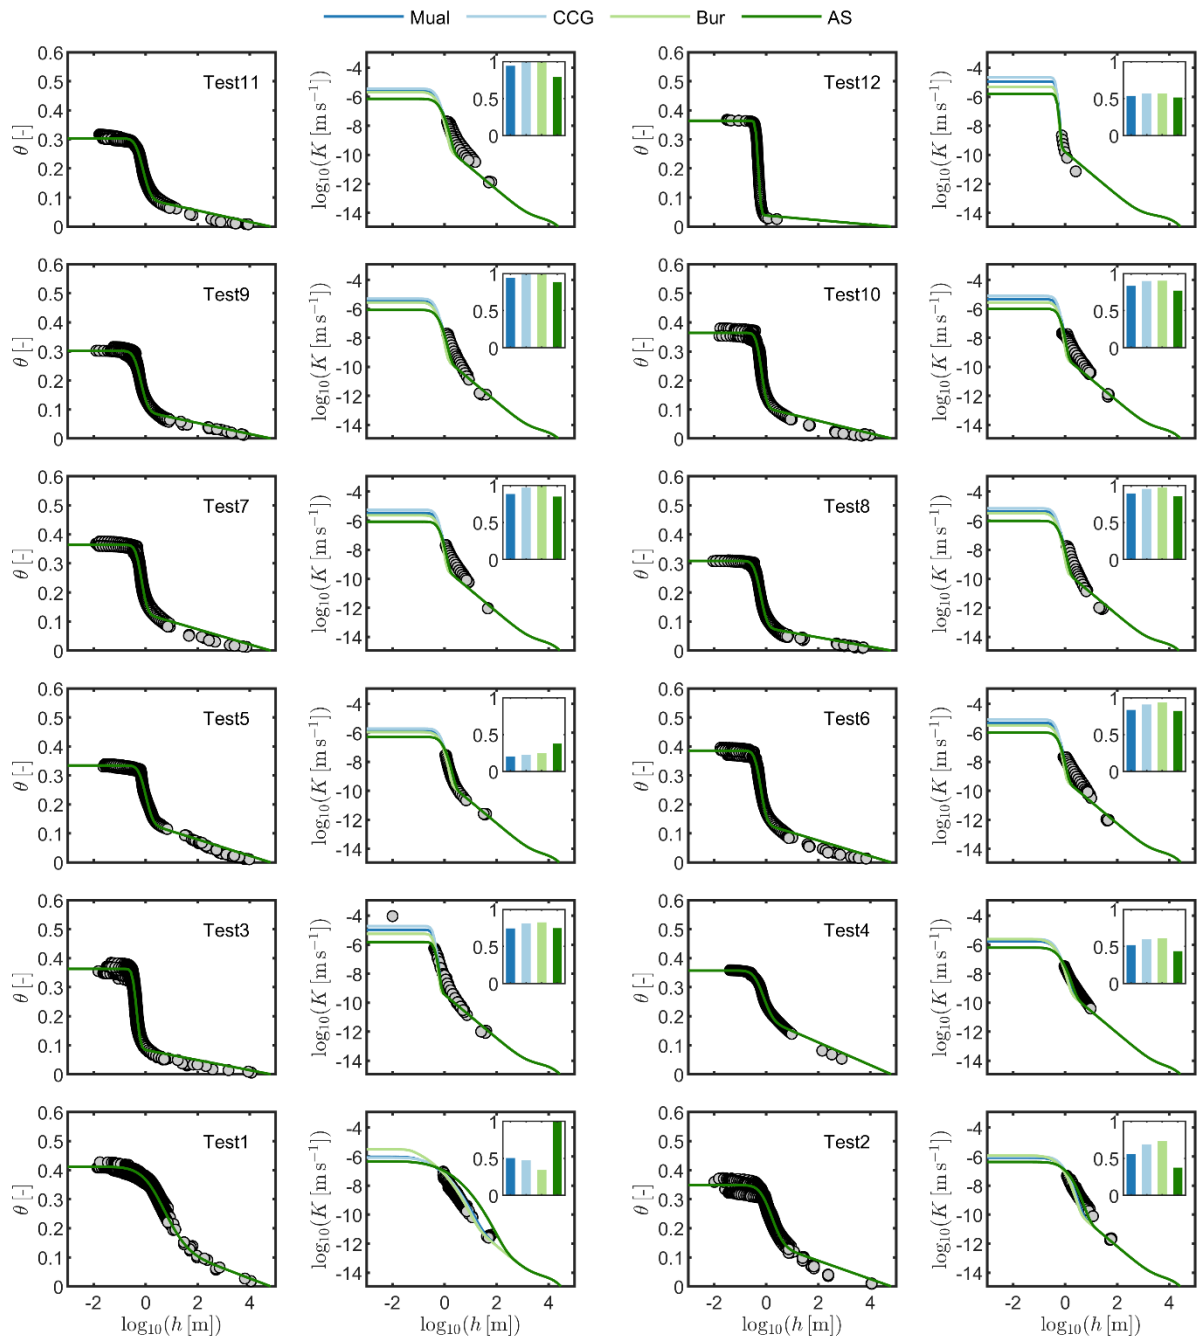

93

94 Fig. S13: Measured data (dots), fitted retention functions (left) and fully predicted conductivity  
 95 functions (right). Shown are the first 12 out of the 23 test data sets and the **Kos-PDI** retention model  
 96 combined with the 4 capillary bundle models. Bars show the RMSE<sub>logK</sub> values for the different used  
 97 capillary bundle models. Note that the conductivity curves are not fits to the data but pure  
 98 predictions.

99

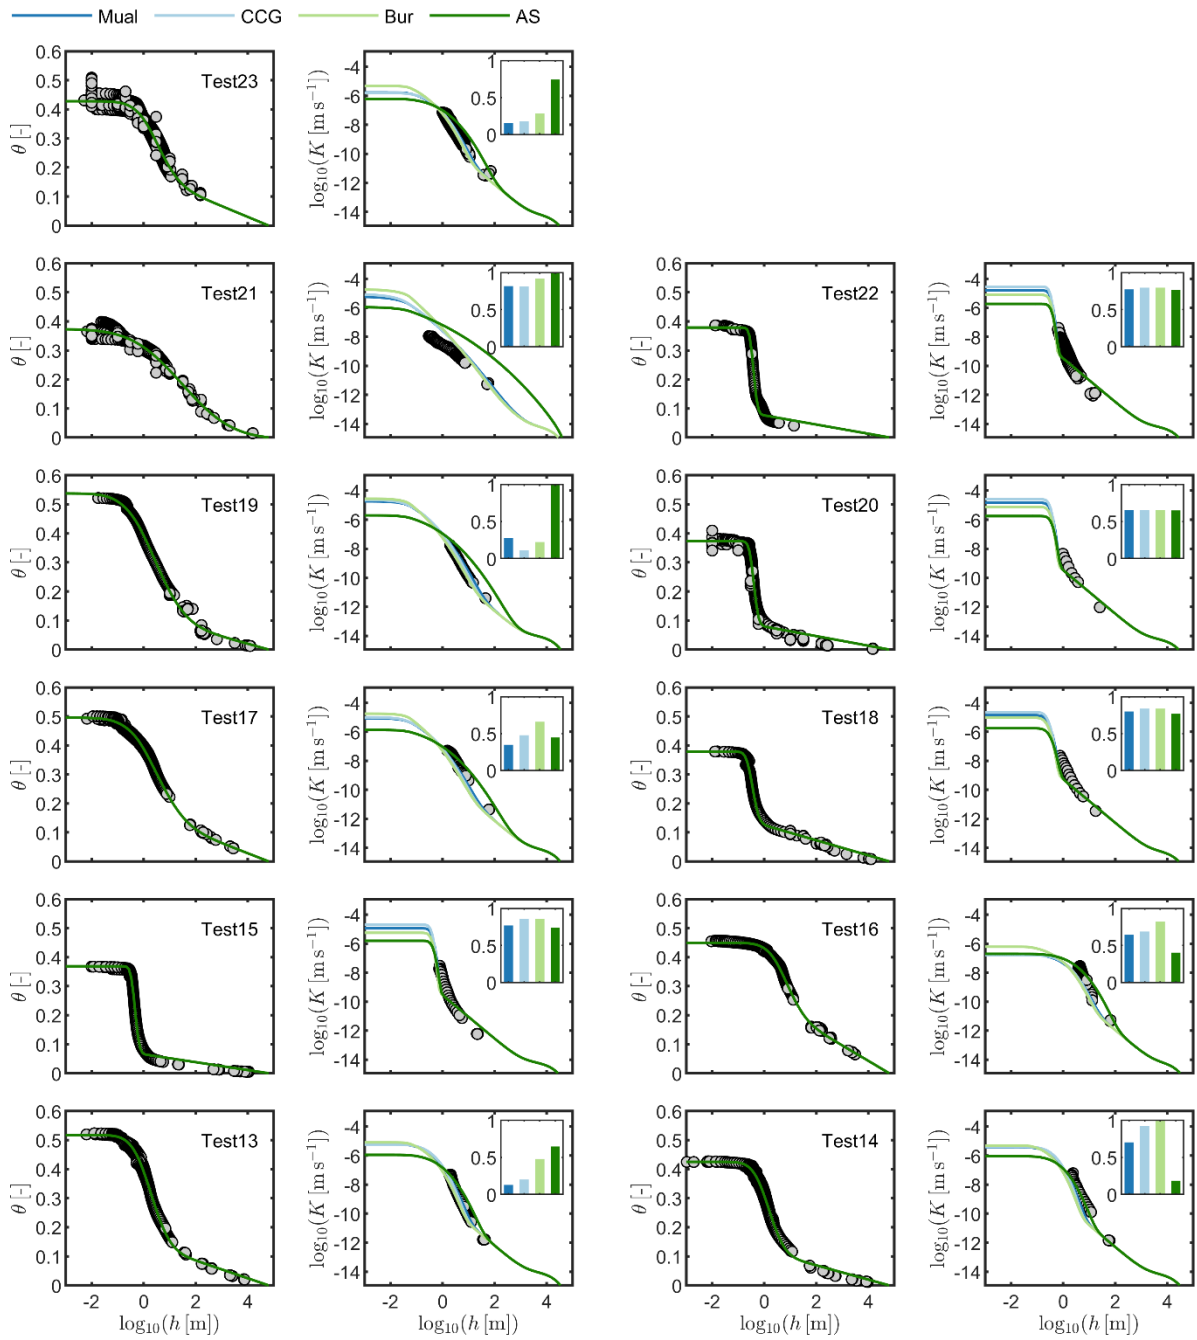

Fig. S14: Measured data (dots), fitted retention functions (left) and fully predicted conductivity functions (right). Shown are data set 13 to 23 of the test data sets and the **Kos-PDI** retention model combined with the 4 capillary bundle models. Bars show the RMSE<sub>logK</sub> values for the different used capillary bundle models. Note that the conductivity curves are not fits to the data but pure predictions.

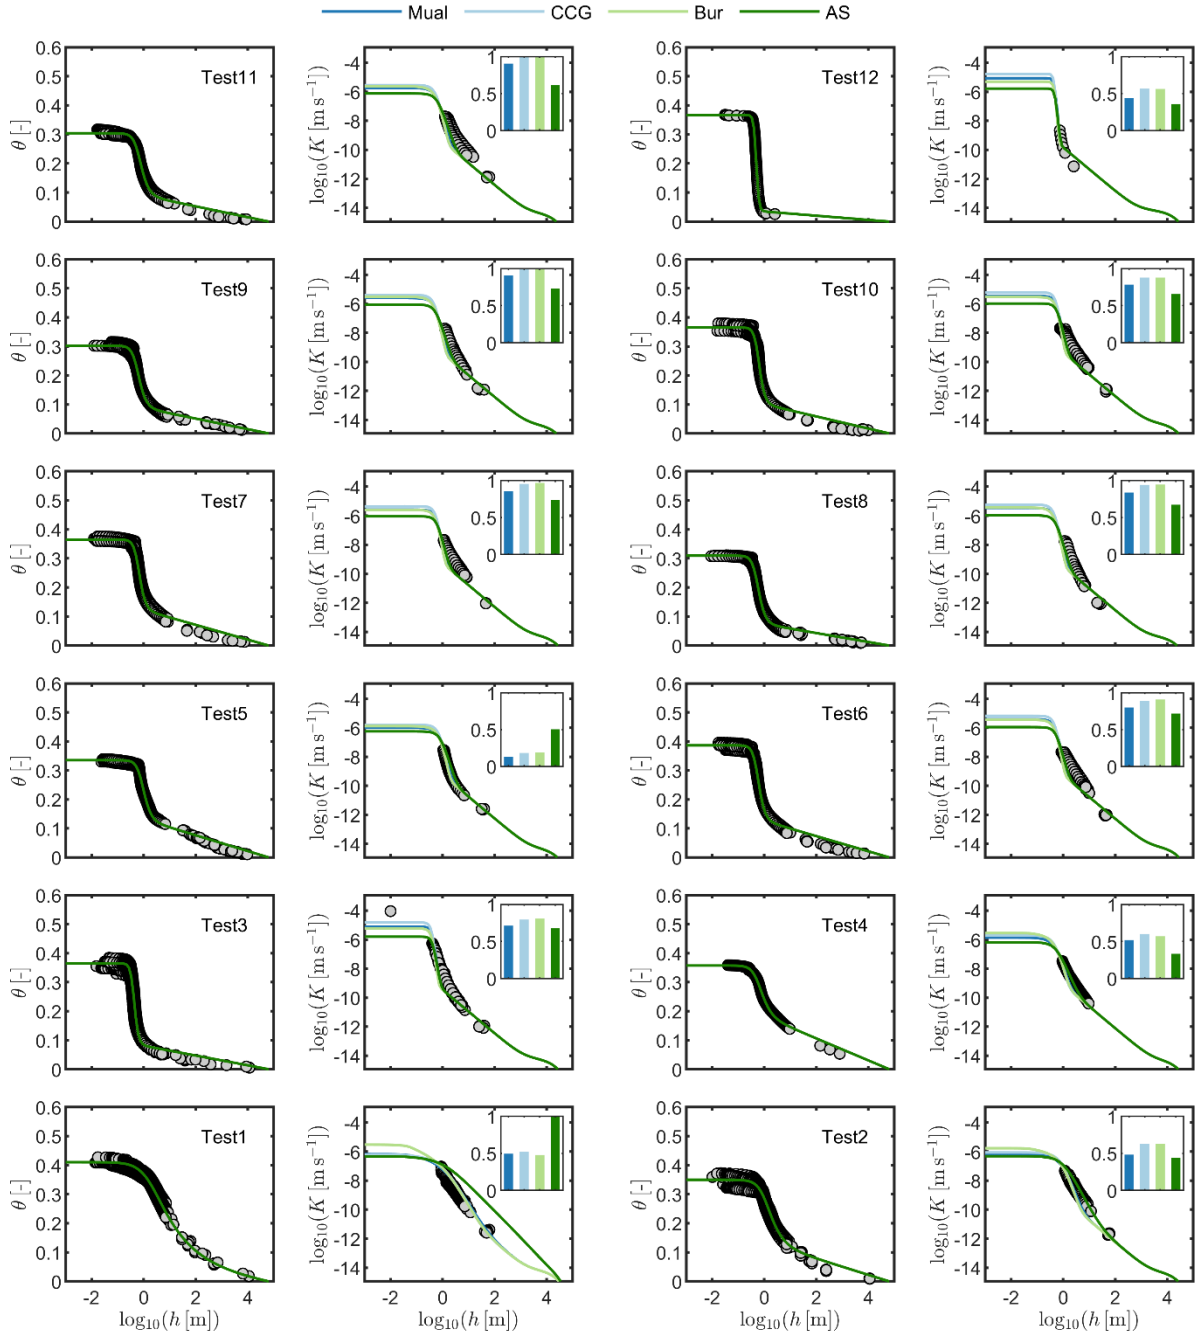

Fig. S15: Measured data (dots), fitted retention functions (left) and fully predicted conductivity functions (right). Shown are the first 12 out of the 23 test data sets and the **vGc-PDI** retention model combined with the 4 capillary bundle models. Bars show the  $\text{RMSE}_{\log K}$  values for the different used capillary bundle models. Note that the conductivity curves are not fits to the data but pure predictions.



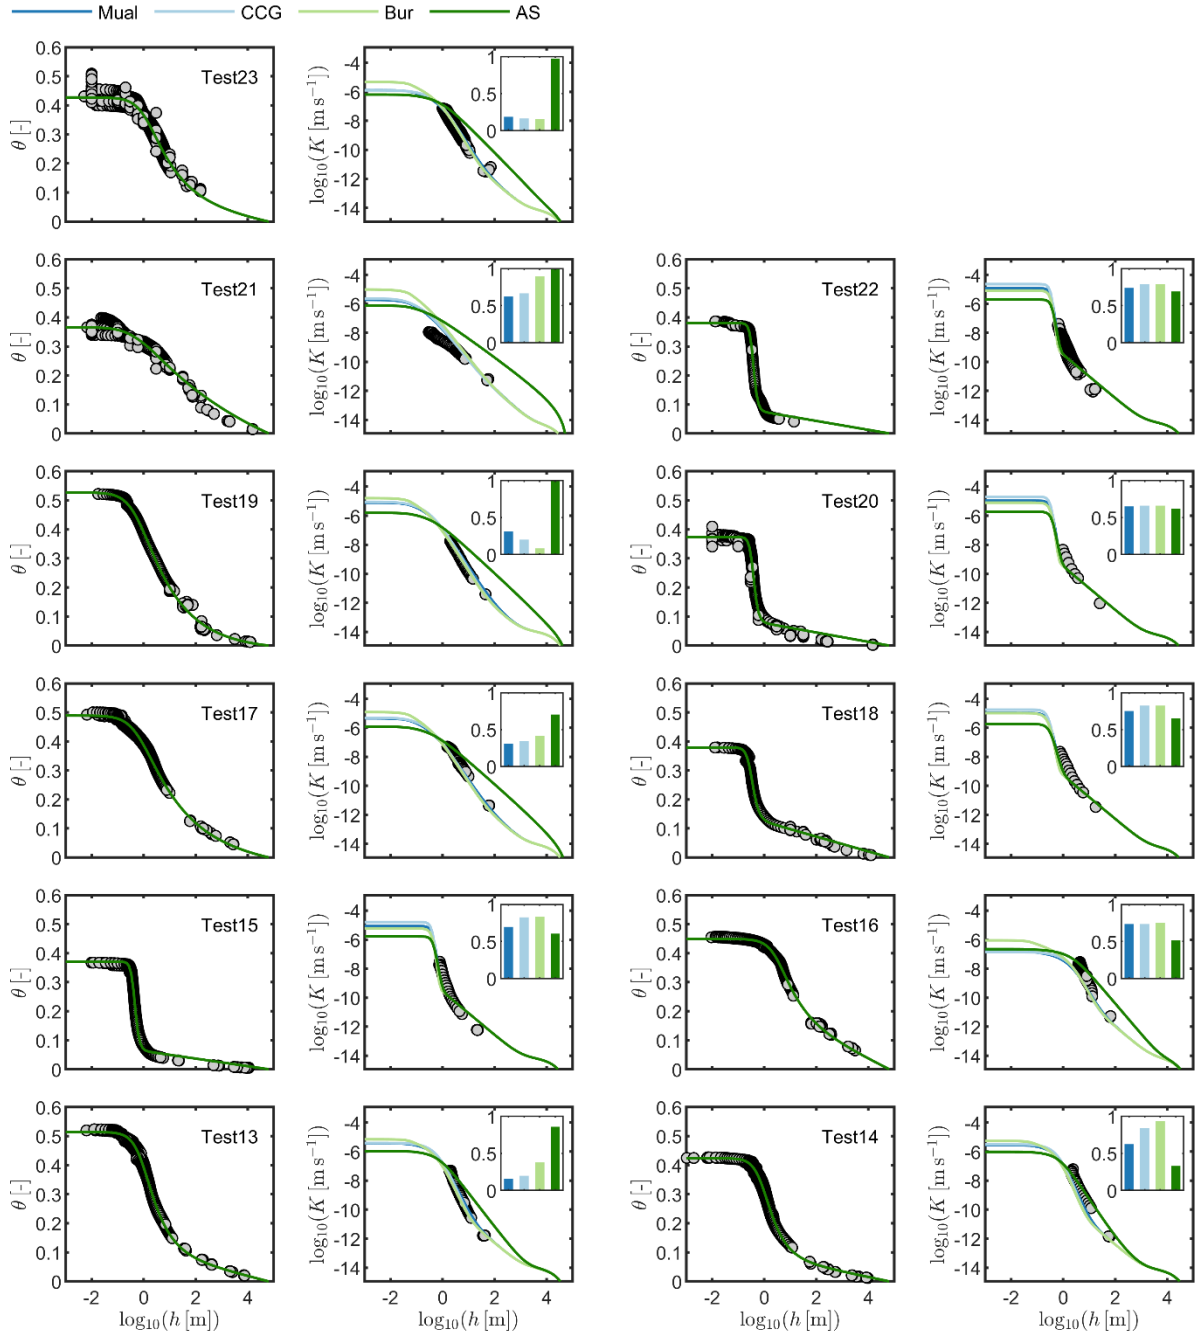

Fig. S16: Measured data (dots), fitted retention functions (left) and fully predicted conductivity functions (right). Shown are data set 13 to 23 of the test data sets and the **vGc-PDI** retention model combined with the 4 capillary bundle models. Bars show the RMSE<sub>logK</sub> values for the different used capillary bundle models. Note that the conductivity curves are not fits to the data but pure predictions.

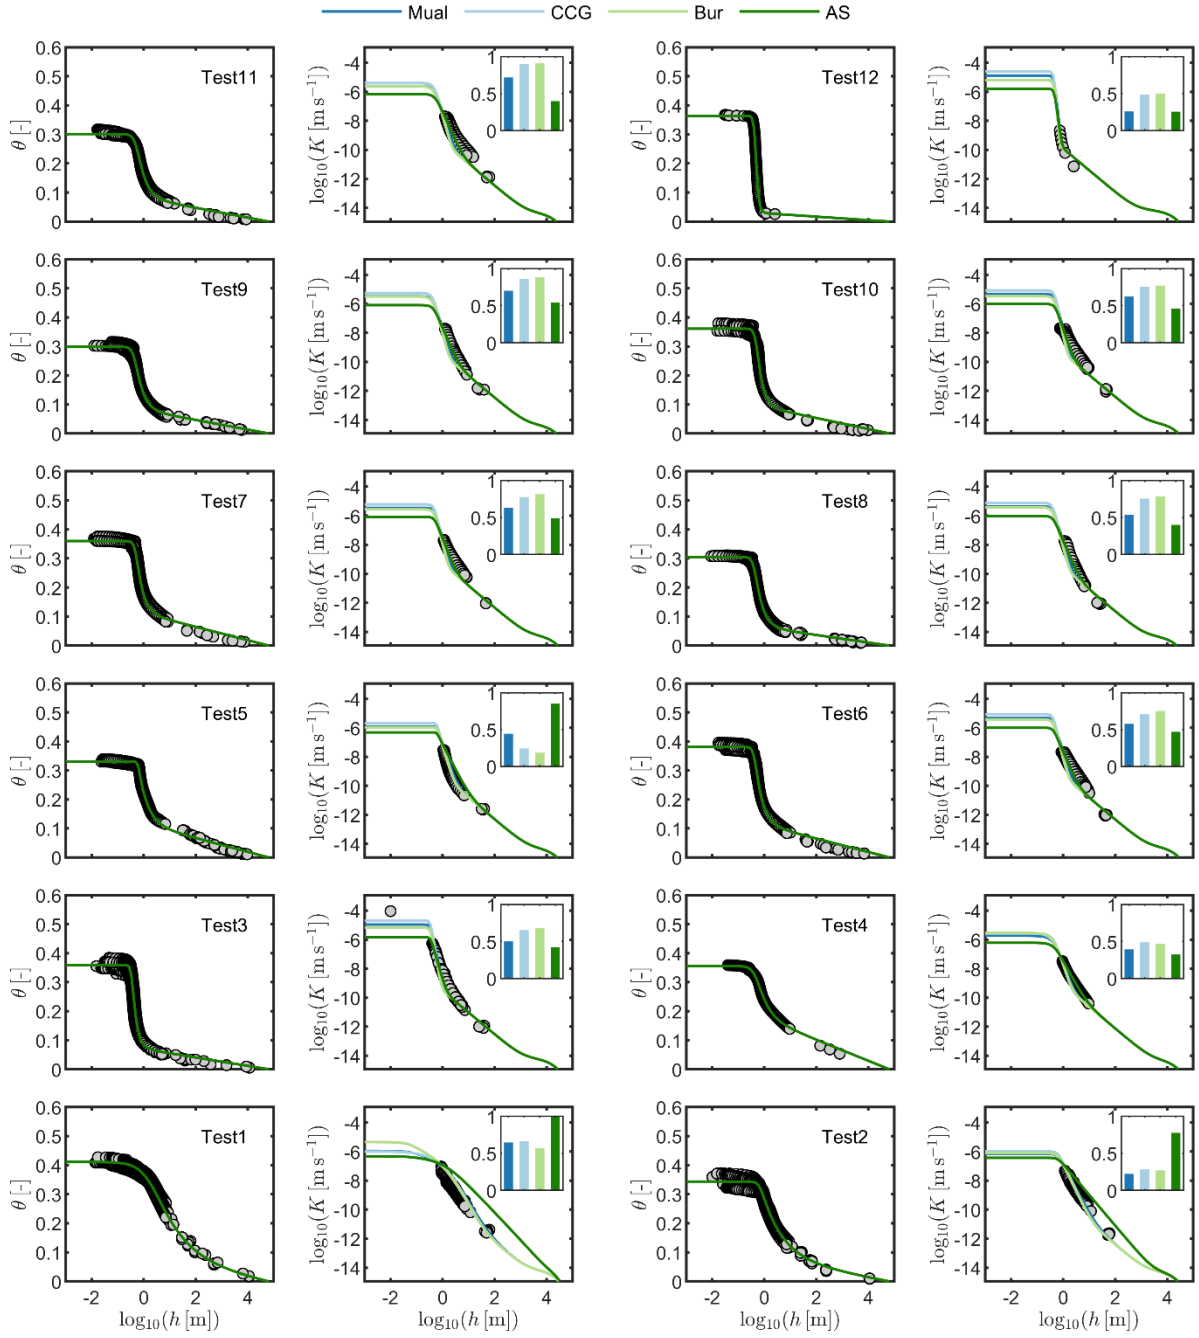

Fig. S17: Measured data (dots), fitted retention functions (left) and fully predicted conductivity functions (right). Shown are the first 12 out of the 23 test data sets and the **vGmn-PDI** retention model combined with the 4 capillary bundle models. Bars show the  $\text{RMSE}_{\log K}$  values for the different used capillary bundle models. Note that the conductivity curves are not fits to the data but pure predictions.

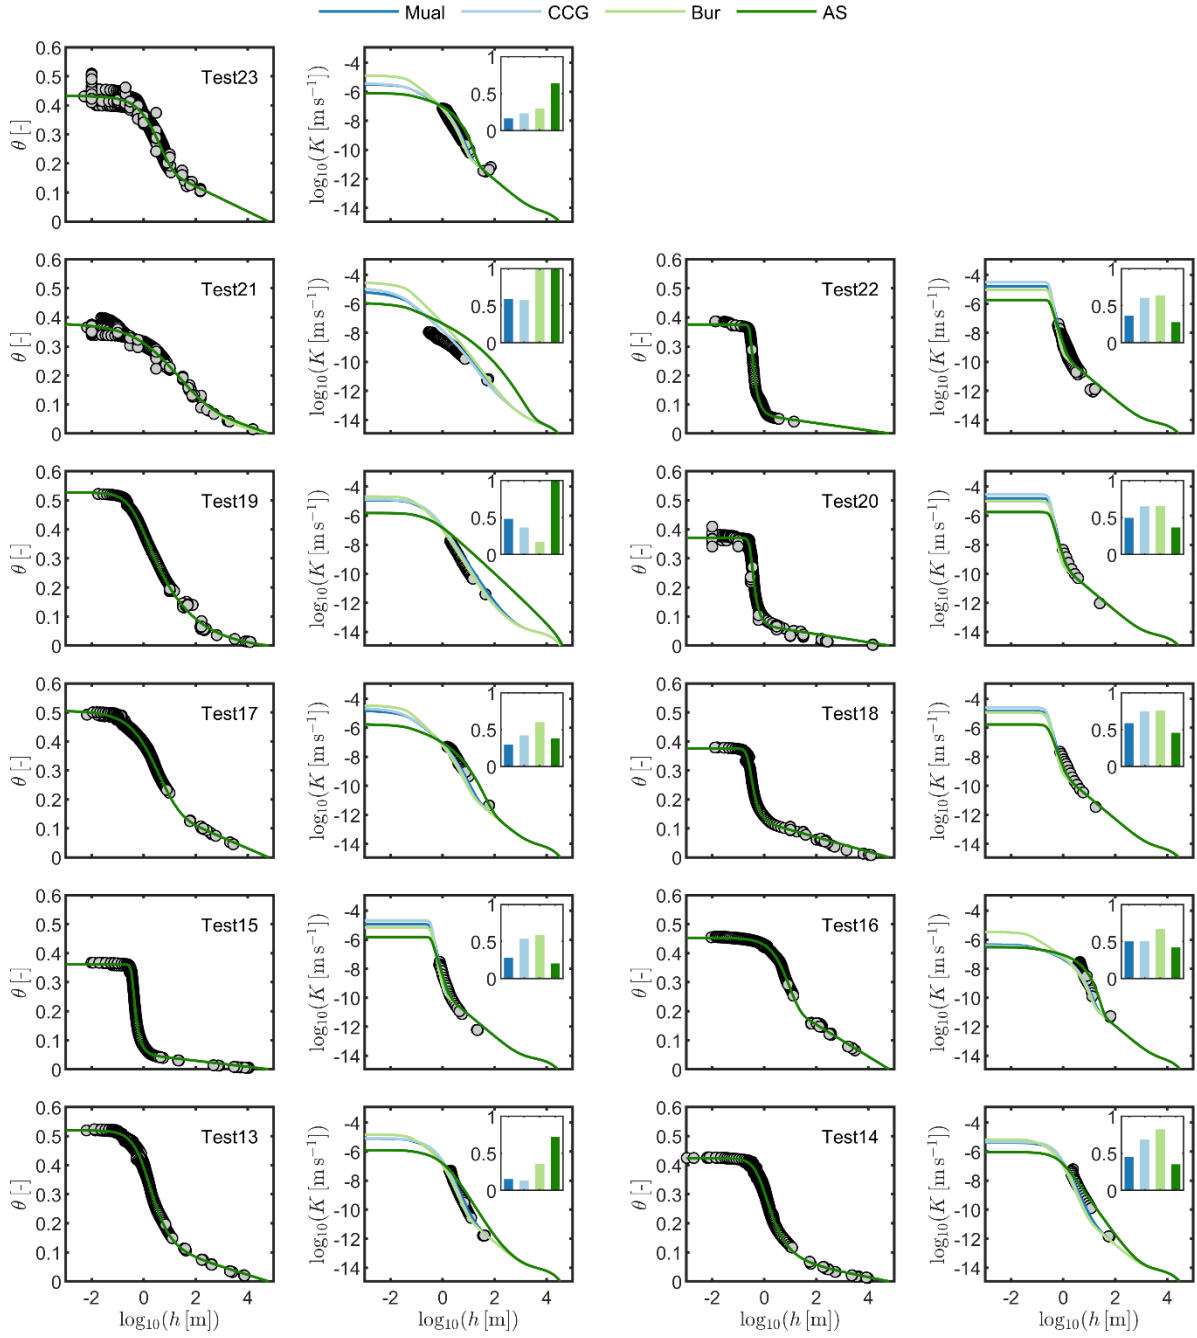

128

129

130

131

132

133

Fig. S18: Measured data (dots), fitted retention functions (left) and fully predicted conductivity functions (right). Shown are data set 13 to 23 of the test data sets and the **vGmn-PDI** retention model combined with the 4 capillary bundle models. Bars show the RMSE<sub>logK</sub> values for the different used capillary bundle models. Note that the conductivity curves are not fits to the data but pure predictions.

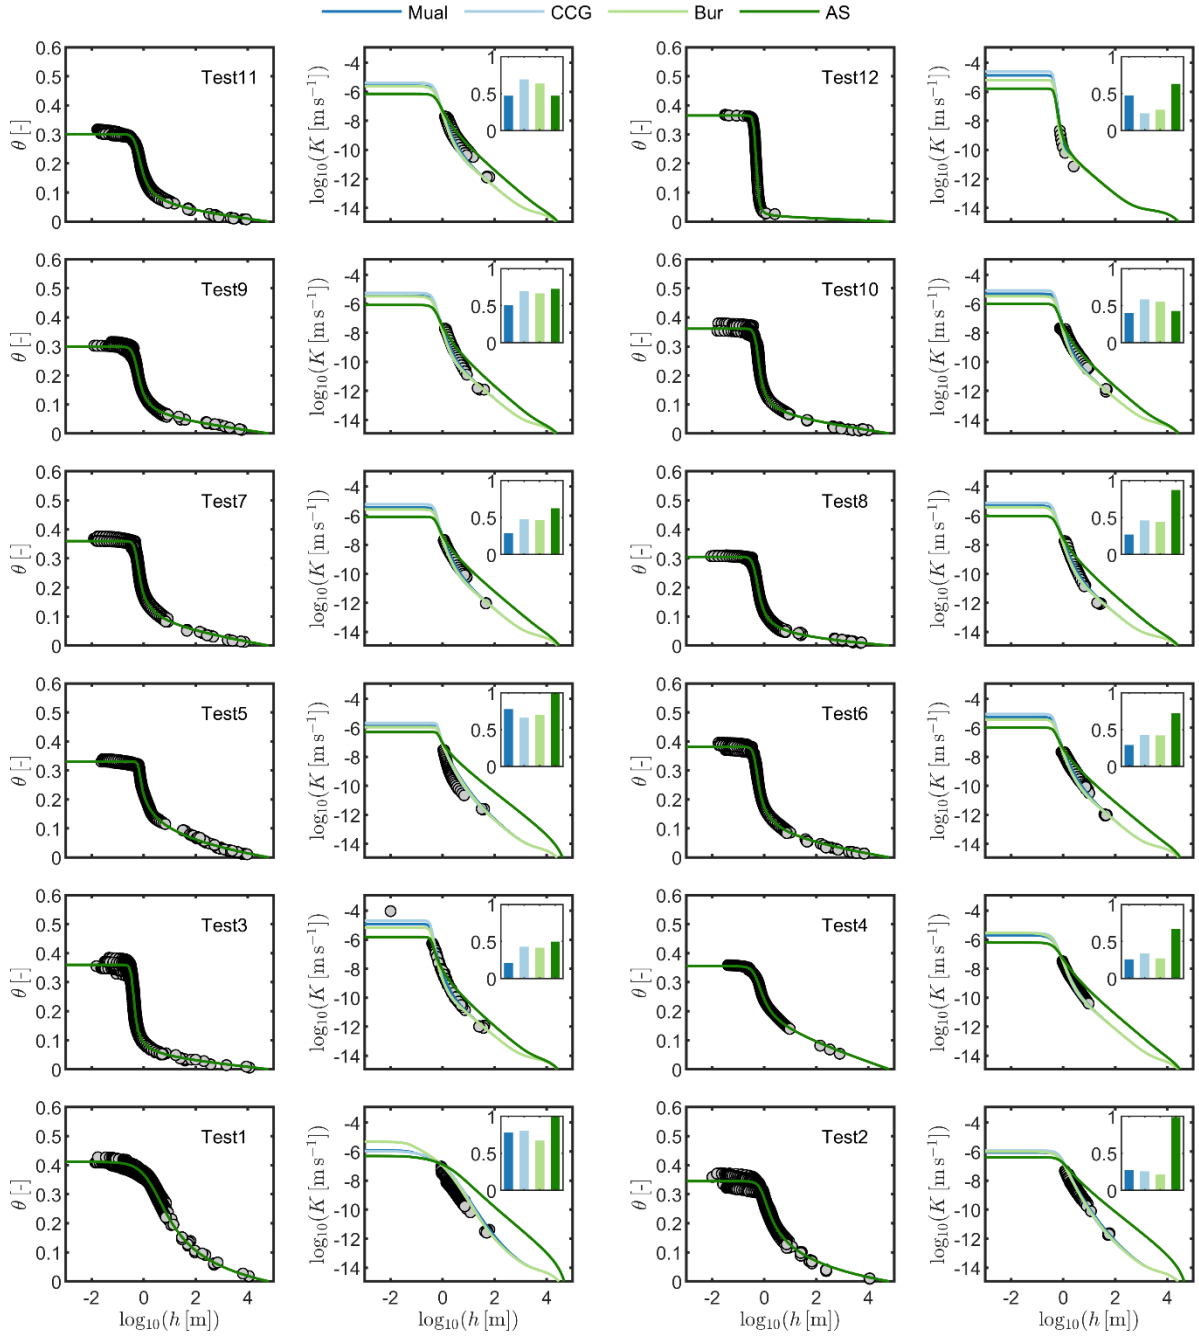

Fig. S19: Measured data (dots), fitted retention functions (left) and fully predicted conductivity functions (right). Shown are the first 12 out of the 23 test data sets and the **FX-PDI** retention model combined with the 4 capillary bundle models. Bars show the  $\text{RMSE}_{\log K}$  values for the different used capillary bundle models. Note that the conductivity curves are not fits to the data but pure predictions.

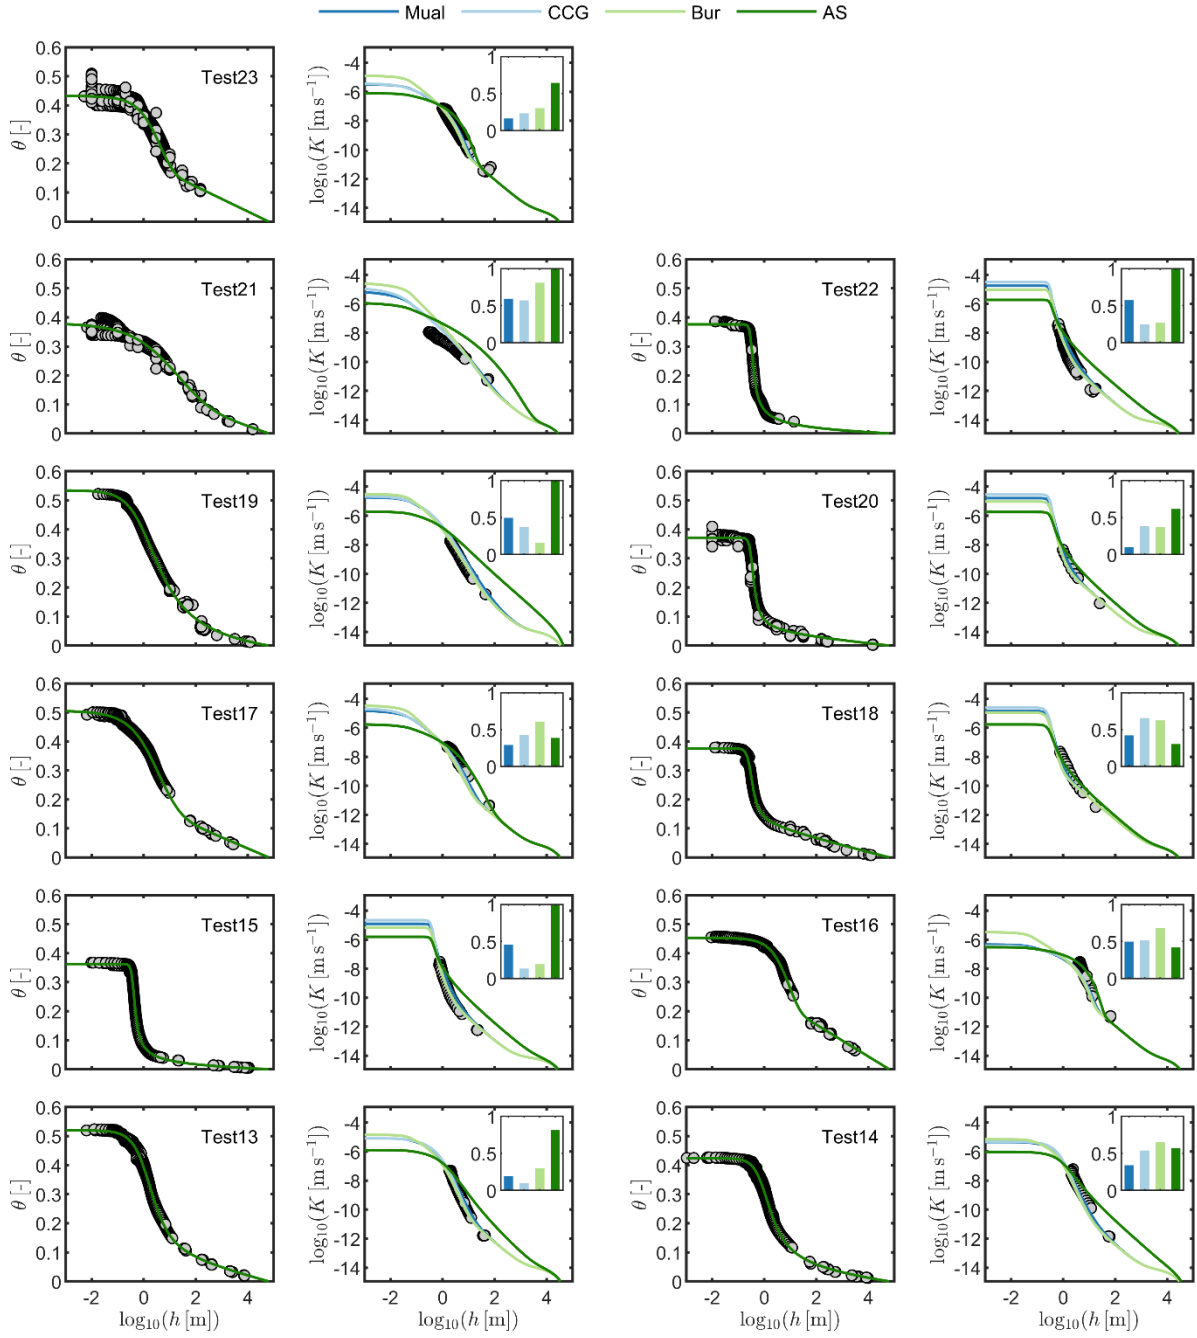

Fig. S20: Measured data (dots), fitted retention functions (left) and fully predicted conductivity functions (right). Shown are data set 13 to 23 of the test data sets and the **FX-PDI** retention model combined with the 4 capillary bundle models. Bars show the RMSE<sub>logK</sub> values for the different used capillary bundle models. Note that the conductivity curves are not fits to the data but pure predictions.
